# Supplementary material for: Effect of Copper Antifouling Paint on Marine Degradation of Polypropylene: Uneven Distribution of Microdebris between Nagasaki Port and Goto Island, Japan
Source: MDPI journal article supplement (doi:10.3390/molecules29051173), 2024-03-06
Supplement: s1 [file s1]

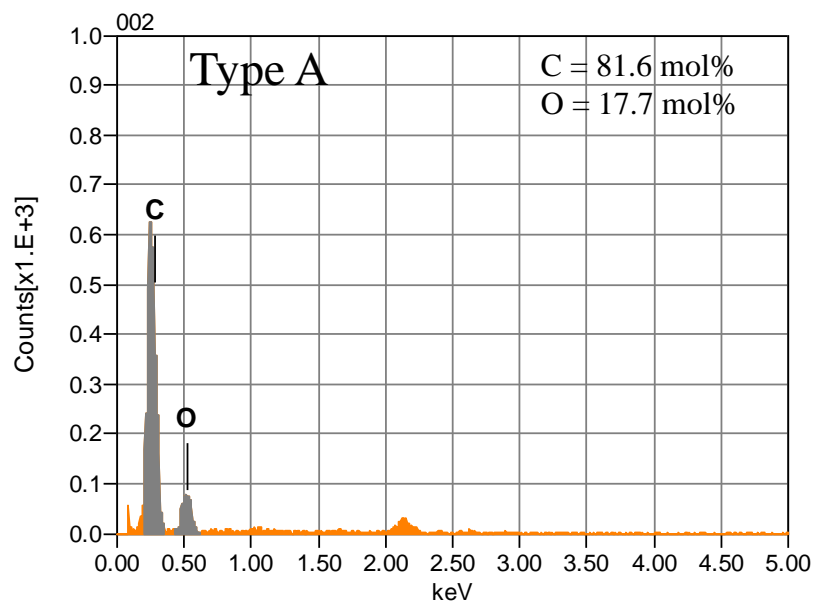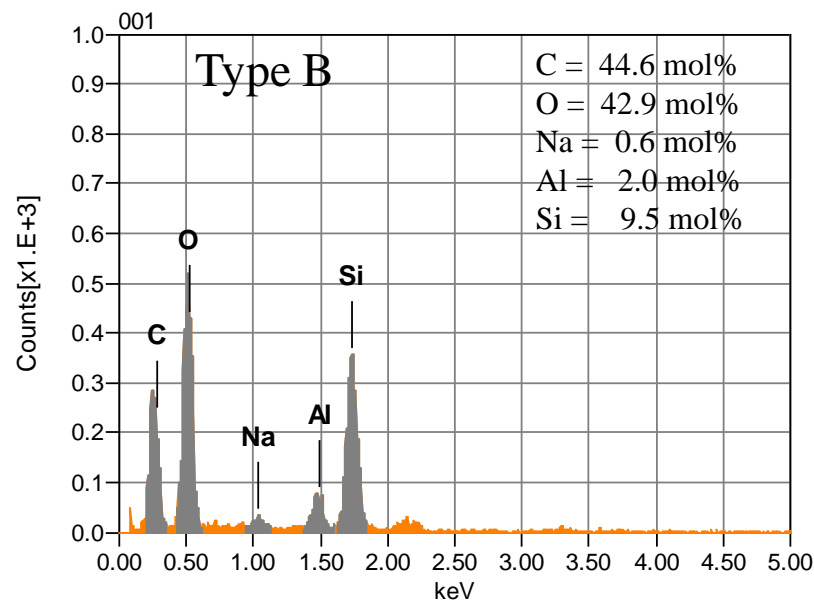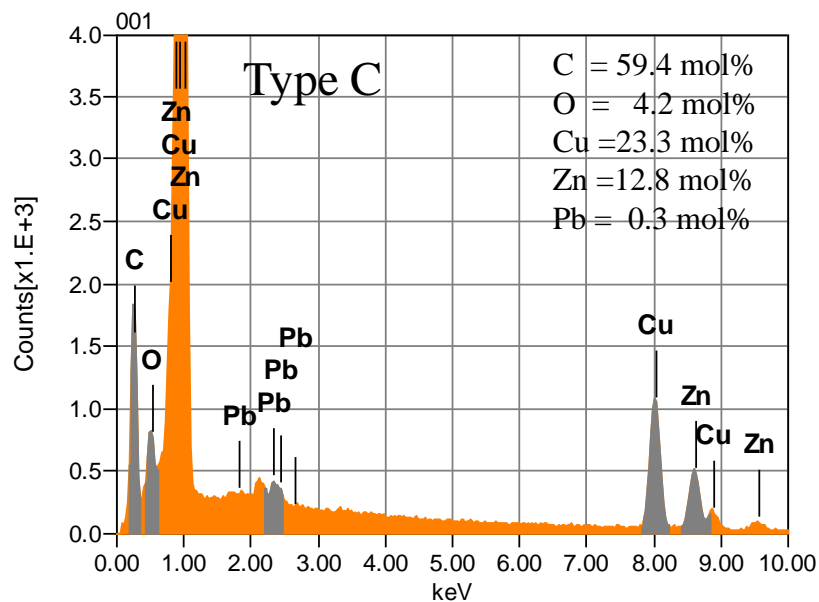

Figure S1 EDX analysis of samples retrieved by the sea: Type A: MP. Type B: Si based paint particle. Type C: Cu base paint particle Notes: Measuring elements except gold coating material.

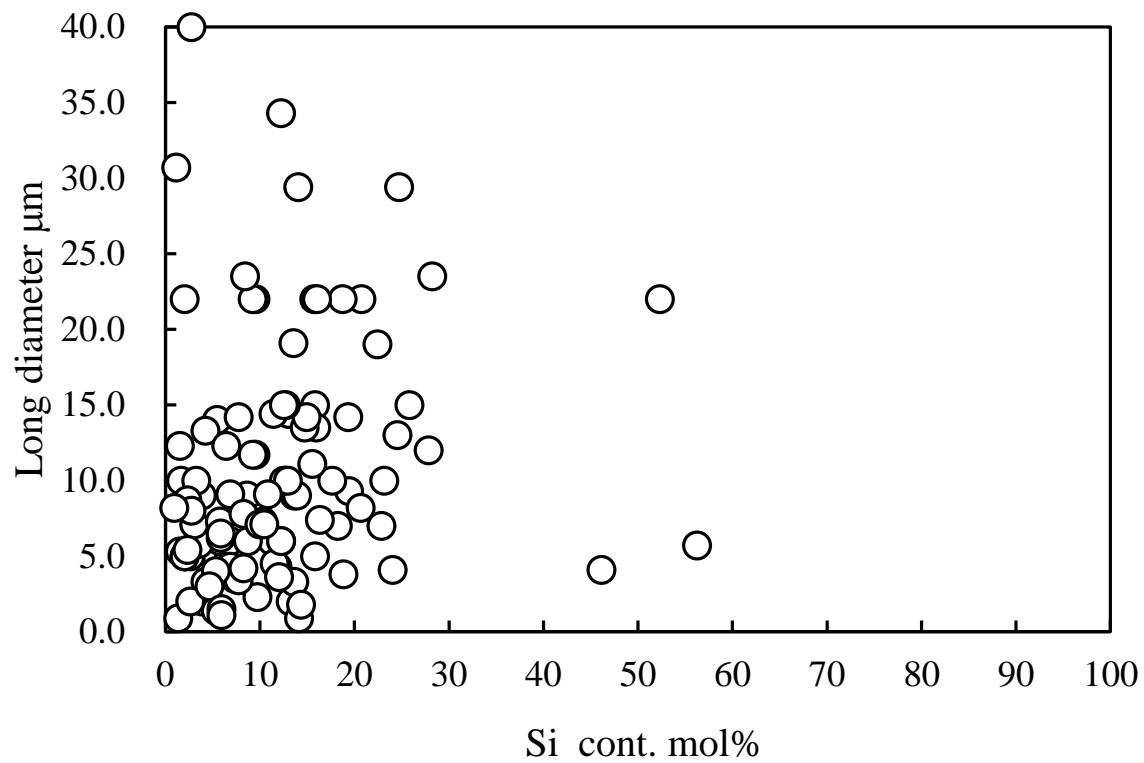

Figure S2 Relationship between Si content ratio and long diameter of type B (Si based paint particle) samples retrieved from the sea.

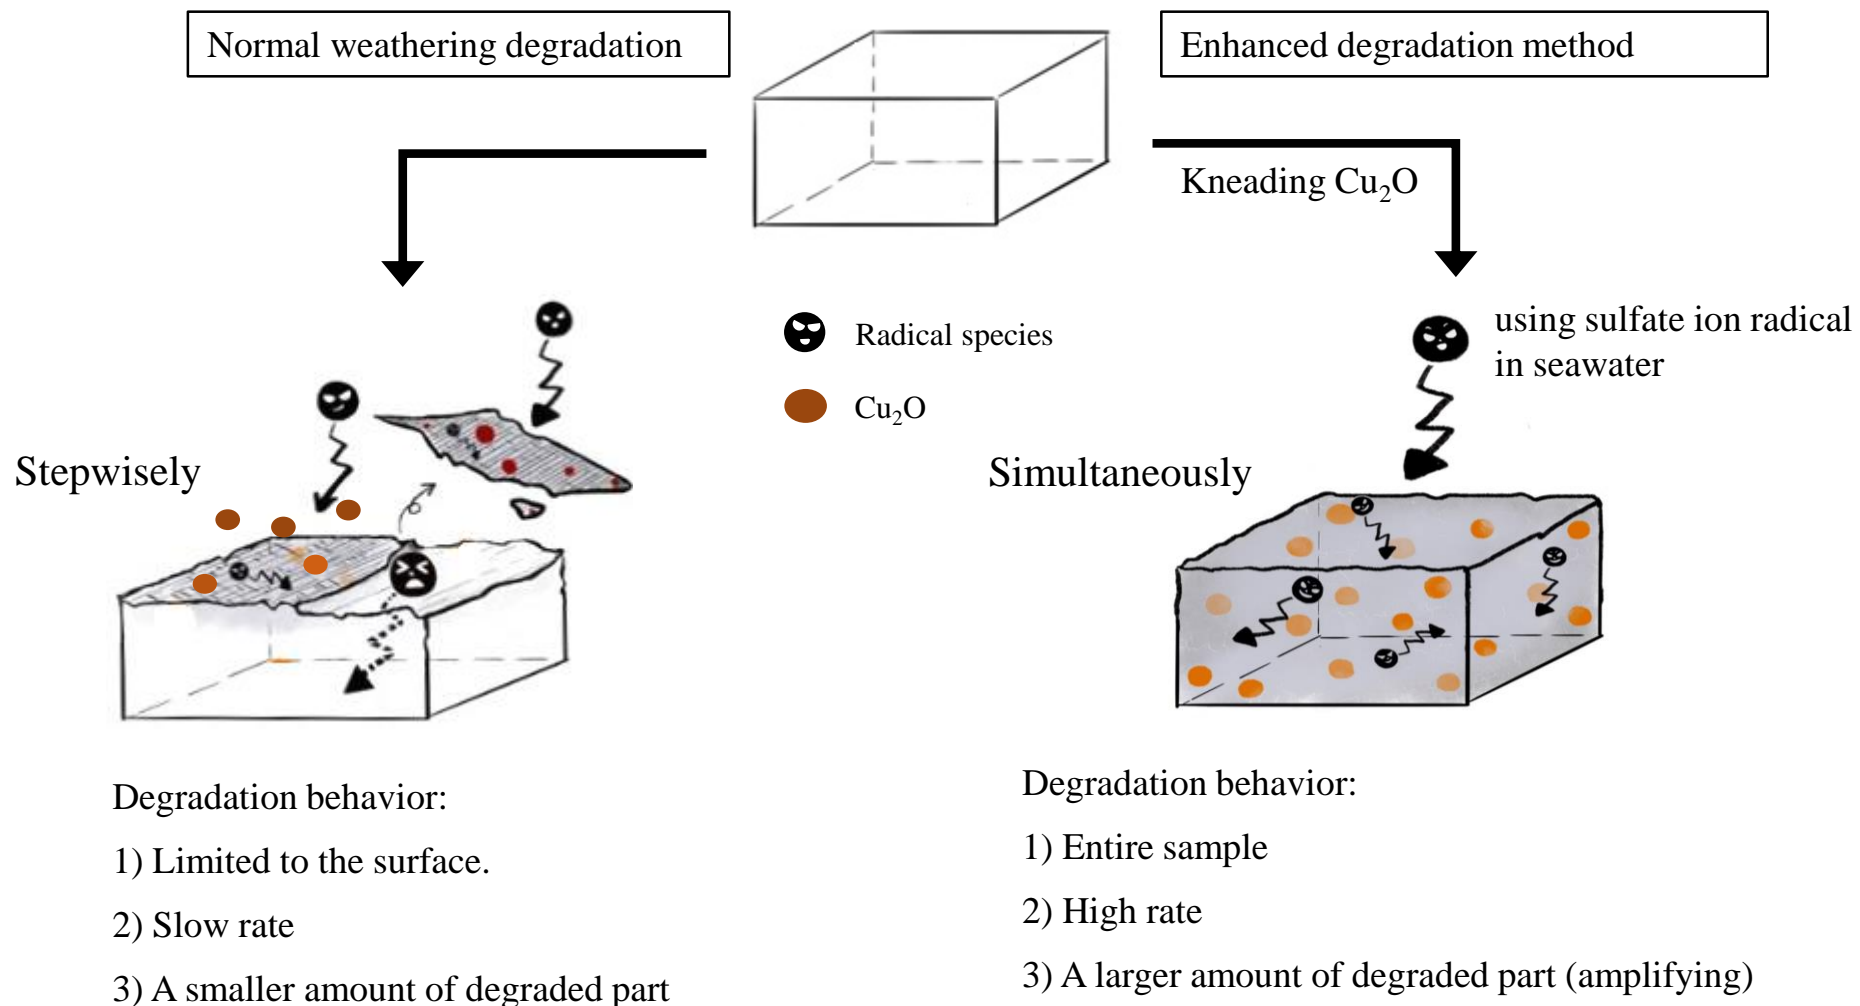

Figure S3 Comparison of degradation behavior between normal weathering degradation and enhanced degradation in seawater.

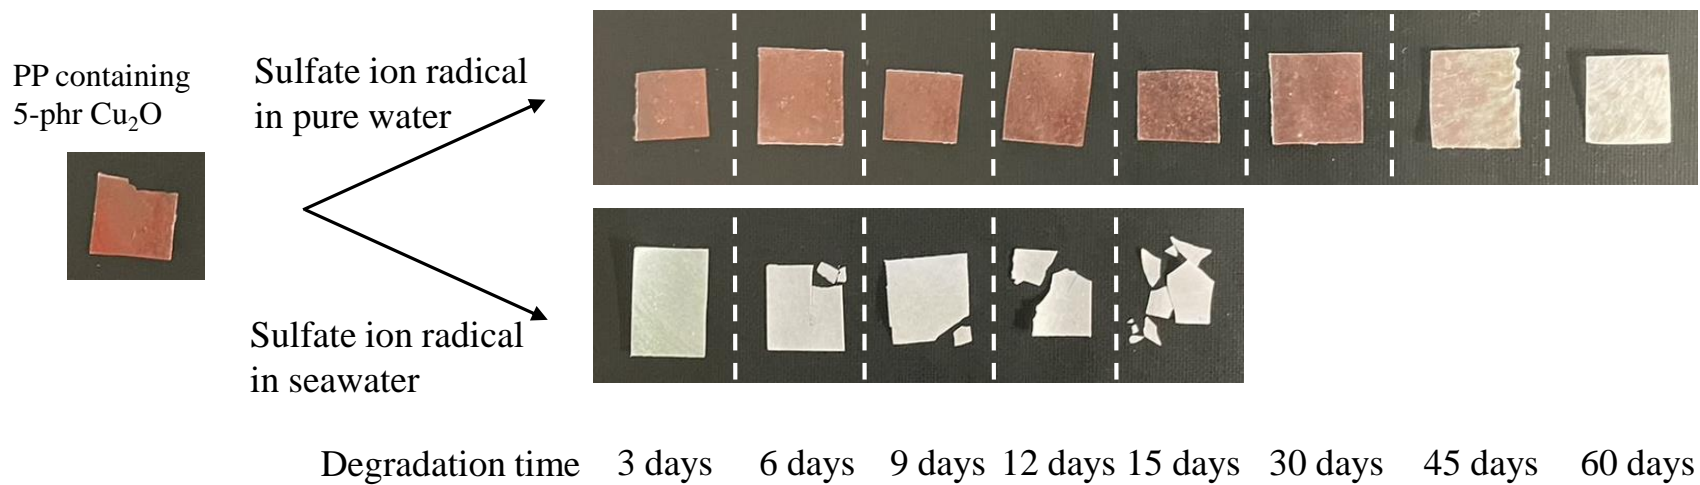

Figure S4 Color change of PP containing 5-phr  $\text{Cu}_2\text{O}$  film by the enhanced degradation method..

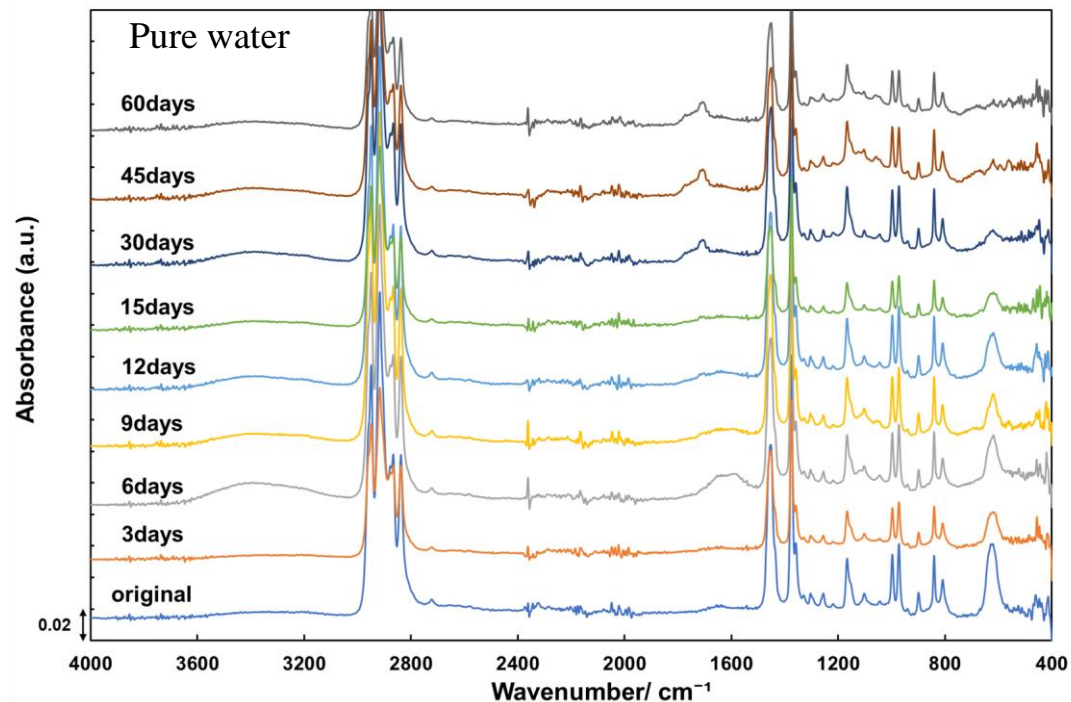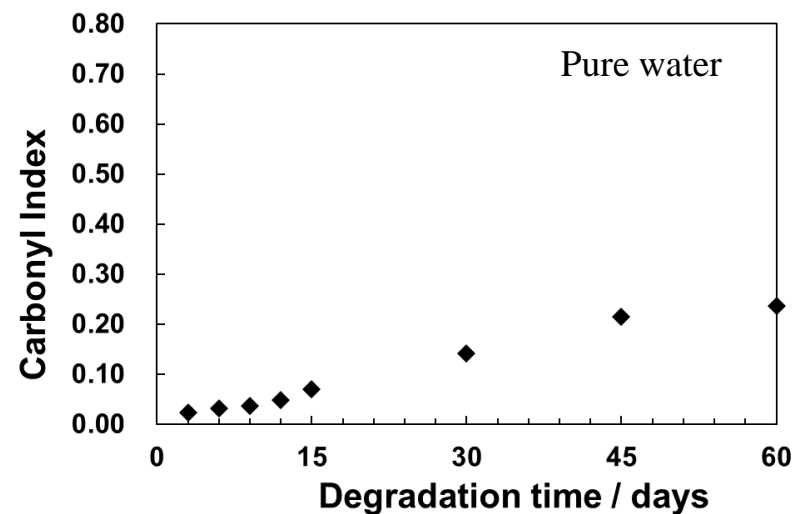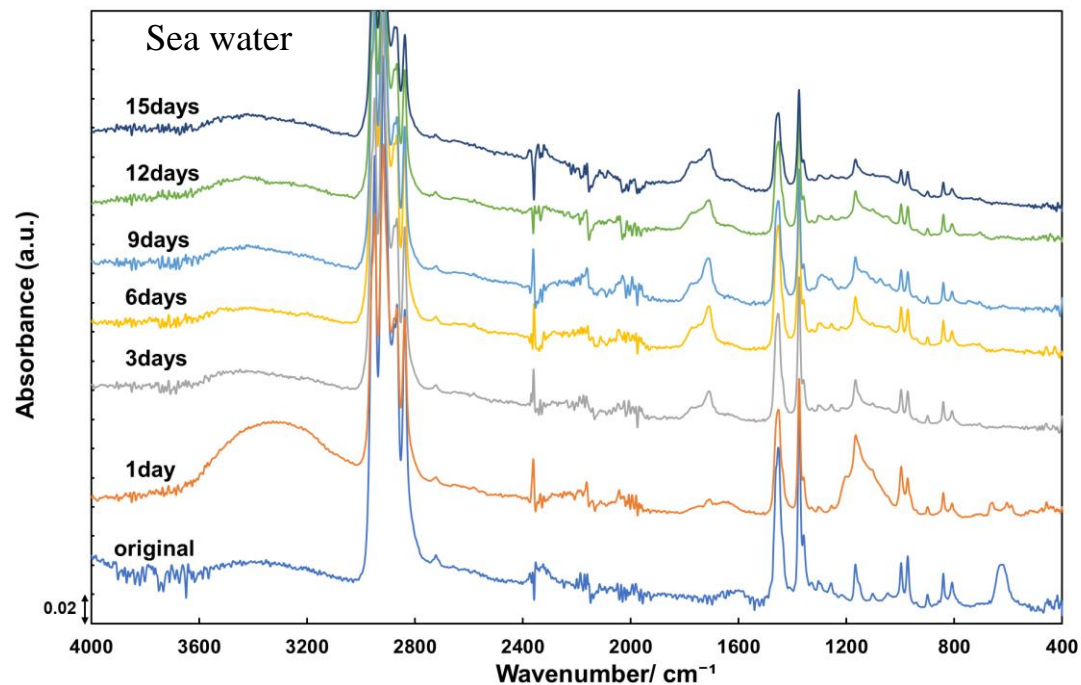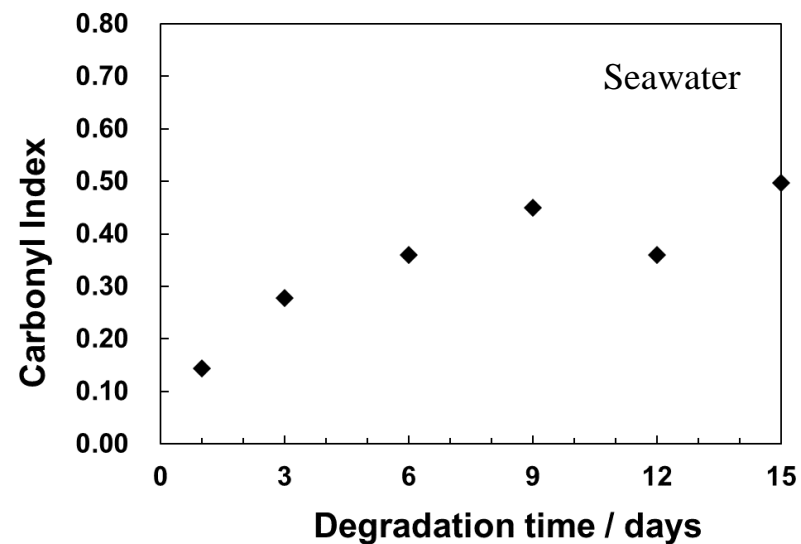

Figure S5 Degradation time dependences of FT-IR spectra and carbonyl index values of degraded PP containing 5-phr  $\text{Cu}_2\text{O}$  by the enhanced degradation method in pure and seawater.

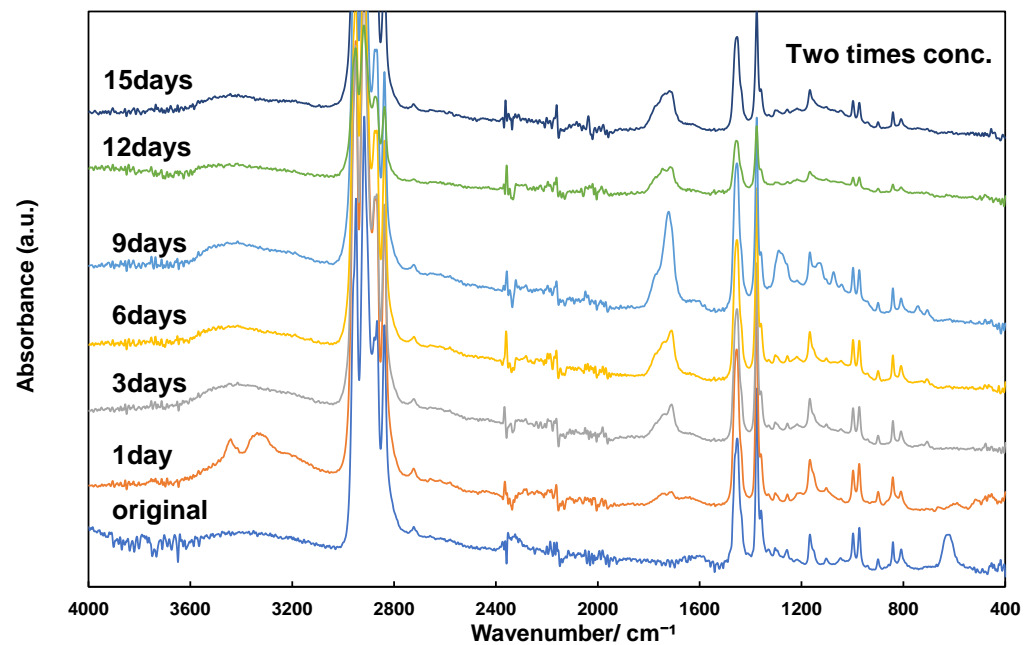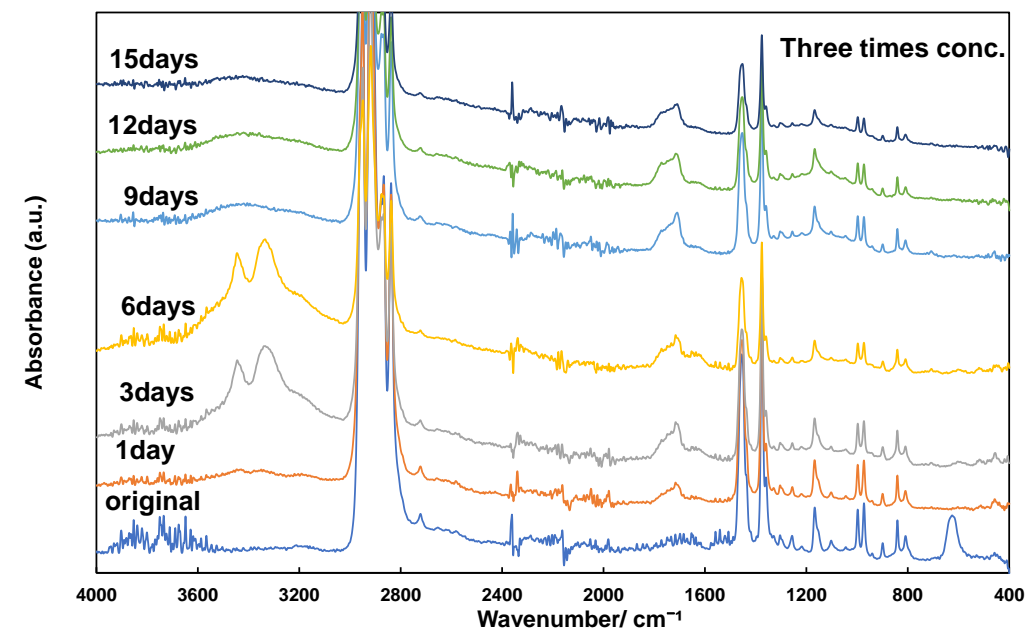

Figure S6 Degradation time dependences of FT-IR spectra of degraded PP containing 5-phr  $\text{Cu}_2\text{O}$  by the enhanced degradation method in two and three times salinity concentrations of seawater.

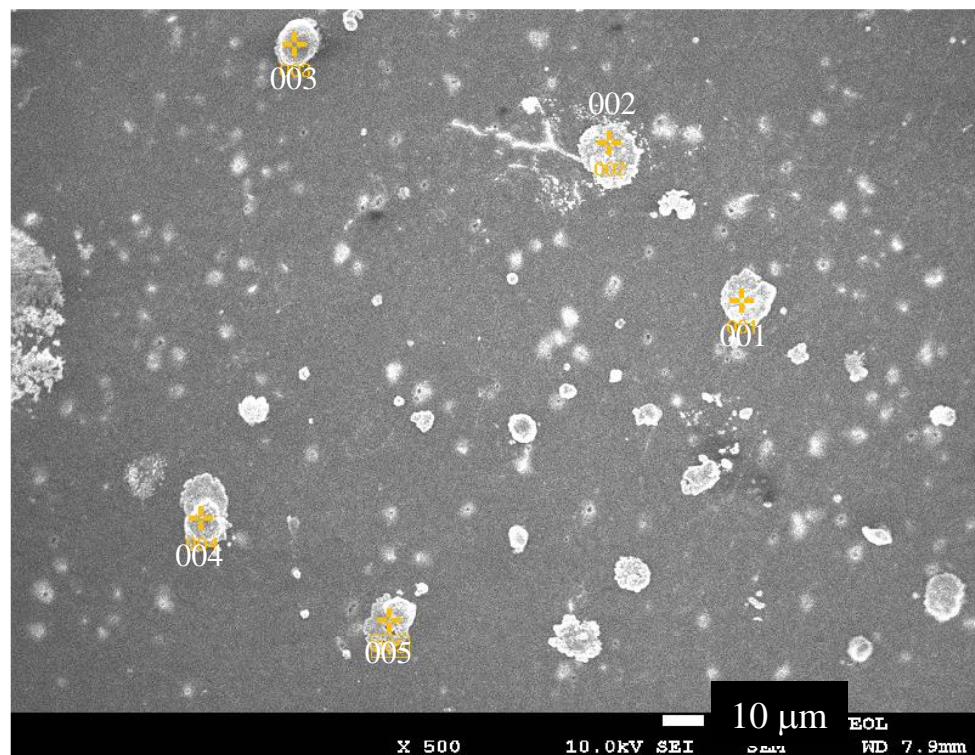

|     | O<br>(mol%) | C<br>(mol%) | Cl<br>(mol%) | Cu<br>(mol%) | Hg<br>(mol%) |
|-----|-------------|-------------|--------------|--------------|--------------|
| 001 |             |             |              |              |              |
| 002 | 34.76       |             | 17.15        | 48.09        |              |
| 003 | 35.16       |             | 24.58        | 40.26        |              |
| 004 | 36.36       |             | 22.25        | 41.39        |              |
| 005 | 9.48        | 59.43       | 24.69        | 3.09         | 3.30         |

Figure S7 SEM/EDX analysis of degraded PP containing 5-phr Cu<sub>2</sub>O by the enhanced degradation method in seawater for 3 days.



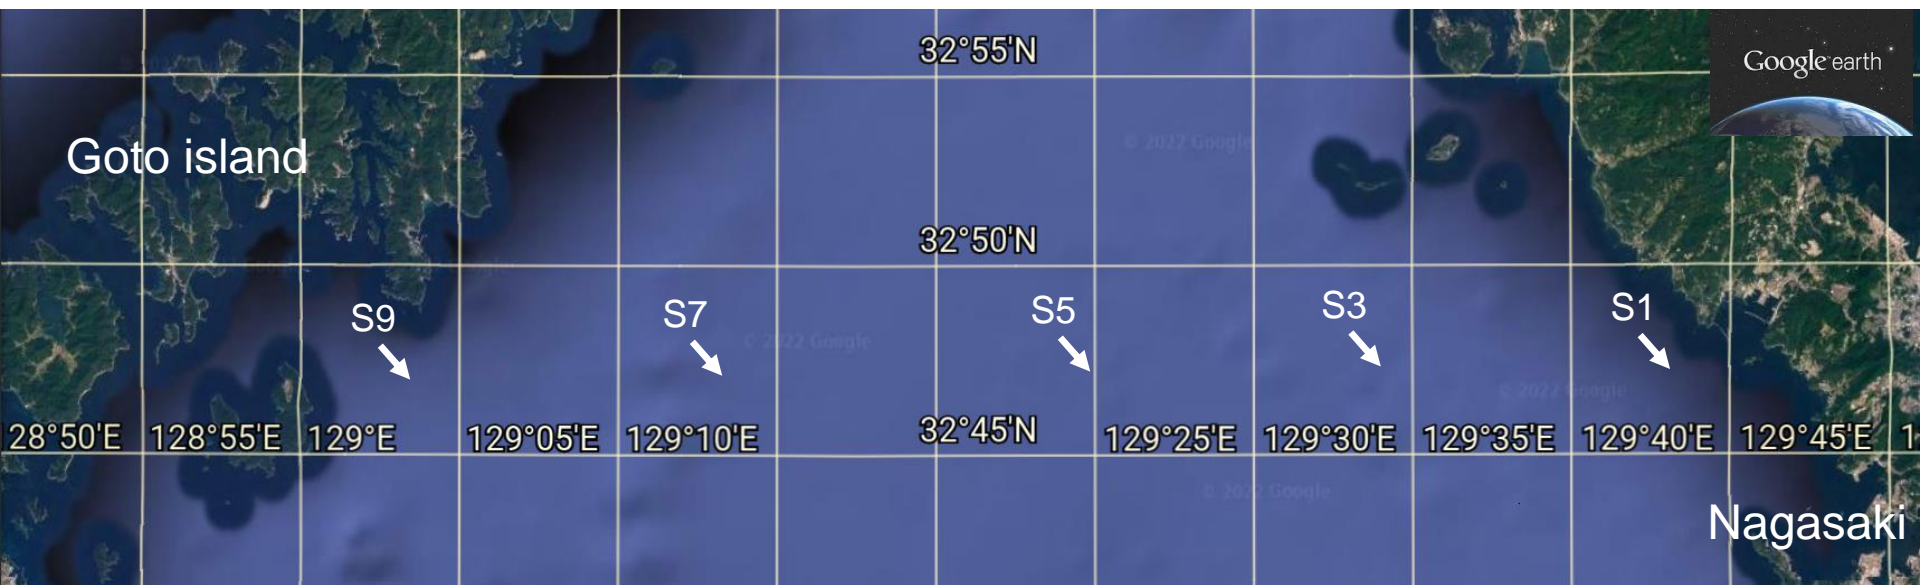

Figure S8 Sampling station number and coordinates.

<https://earth.google.com/web/@32.74617752,129.31950128,6.83991611a,77186.95662495d,35y,0h,0t,0r>



TableS 1-1 Results of S1-B sample long diameter (d), EDX analysis and materials

| No, analy. spot | d (μm) | C (%) | O (%) | Al (%) | Si (%) | Cu (%) | Na (%) | Cl (%) | Others (%)        | Materials |
|-----------------|--------|-------|-------|--------|--------|--------|--------|--------|-------------------|-----------|
| 1, 1            | 2.8    | 74.6  | 2.9   | 0      | 0      | 0      | 12.1   | 10.3   | 0                 | A         |
| 1, 2            | 2.8    | 83.9  | 3.4   | 0      | 0      | 0      | 6.7    | 5.7    | 0.3 <sup>a</sup>  | A         |
| 1, 3            | 2.8    | 85.4  | 2.9   | 0      | 0      | 0      | 6.2    | 5.2    | 0.3 <sup>b</sup>  | A         |
| 1, 4            | 2.8    | 74.5  | 0     | 0      | 0      | 0      | 14.0   | 11.6   | 0                 | A         |
| 2, 1            | 0.7    | 86.2  | 13.1  | 0      | 0      | 0      | 0      | 0      | 0.7 <sup>c</sup>  | A         |
| 2, 2            | 0.7    | 85.0  | 15.0  | 0      | 0      | 50     | 50     | 50     | 0                 | A         |
| 3, 1            | 2.3    | 84.3  | 4.1   | 0      | 0      | 0      | 5.8    | 5.2    | 0.7 <sup>d</sup>  | A         |
| 3, 2            | 2.3    | 81.5  | 5.2   | 0      | 0      | 0      | 7.4    | 5.1    | 0.8 <sup>e</sup>  | A         |
| 3, 3            | 2.3    | 74.4  | 3.0   | 0      | 0      | 0      | 11.7   | 10.4   | 0.5 <sup>f</sup>  | A         |
| 4, 1            | 9.8    | 85.2  | 14.1  | 0      | 0      | 0      | 0      | 0.7    | 0                 | A         |
| 4, 2            | 9.8    | 81.6  | 17.7  | 0      | 0      | 0      | 0      | 0      | 0.7 <sup>g</sup>  | A         |
| 4, 3            | 9.8    | 85.3  | 11.7  | 0      | 0      | 0      | 1.0    | 1.3    | 0.7 <sup>h</sup>  | A         |
| 4, 4            | 9.8    | 81.3  | 15.4  | 0      | 0      | 0      | 1.3    | 1.0    | 0.9 <sup>i</sup>  | A         |
| 5, 1            | 2.0    | 68.8  | 26.2  | 0.5    | 3.8    | 0      | 0      | 0      | 0.7 <sup>j</sup>  | B         |
| 5, 2            | 2.0    | 31.1  | 54.3  | 0      | 13.2   | 0      | 0      | 0      | 0.6 <sup>k</sup>  | B         |
| 6, 1            | 5.0    | 59.7  | 33.4  | 0.4    | 5.8    | 0      | 0      | 0      | 0.7 <sup>l</sup>  | B         |
| 6, 2            | 5.0    | 26.4  | 55.8  | 0.8    | 15.8   | 0      | 1.2    | 0      | 0                 | B         |
| 6, 3            | 5.0    | 62.9  | 31.0  | 0.3    | 5.4    | 0      | 0      | 0      | 0.3 <sup>m</sup>  | B         |
| 7, 1            | 5.8    | 36.5  | 52.2  | 0      | 0      | 0      | 0      | 0      | 11.3 <sup>n</sup> | A         |
| 7, 2            | 5.8    | 72.4  | 24.7  | 0      | 0      | 0      | 0      | 0      | 2.9 <sup>o</sup>  | A         |

% = mol%. A: Non Si polymers. B: Si paints. C: Cu paints. D: Other paints. E: Al coating laminate films. F: Shell.

<sup>a)</sup> Au = 0.3%   <sup>b)</sup> Au = 0.3%   <sup>c)</sup> Au = 0.7%   <sup>d)</sup> Au = 0.7%   <sup>e)</sup> Au = 0.8%   <sup>f)</sup> Au = 0.5%   <sup>g)</sup> Au = 0.5%   <sup>h)</sup> Au = 0.7%   <sup>i)</sup> Au = 0.9%   <sup>j)</sup> Au = 0.7%   <sup>k)</sup> Au = 0.6%   <sup>l)</sup> Au = 0.7%   <sup>m)</sup> Au = 0.3%   <sup>n)</sup> Ca = 10.8%, Au = 0.5%   <sup>o)</sup> Ca = 1.9%, Au = 1.0%

TableS 1-2 Results of S1-B sample long diameter (d), EDX analysis and materials

| No, analy.<br>spot | d<br>( $\mu\text{m}$ ) | C<br>(%) | O<br>(%) | Al<br>(%) | Si<br>(%) | Cu<br>(%) | Na<br>(%) | Cl<br>(%) | Others<br>(%)     | Materials |
|--------------------|------------------------|----------|----------|-----------|-----------|-----------|-----------|-----------|-------------------|-----------|
| 8, 1               | 0.9                    | 17.7     | 56.3     | 6.1       | 14.1      | 0         | 5.8       | 0         | 0                 | B         |
| 9, 1               | 2.3                    | 36.9     | 46.4     | 3.4       | 9.7       | 0         | 3.7       | 0         | 0                 | B         |
| 10, 1              | 3.3                    | 66.2     | 25.4     | 1.7       | 4.2       | 0         | 1.3       | 0         | 1.2 <sup>a</sup>  | B         |
| 10, 2              | 3.3                    | 21.3     | 55.2     | 4.6       | 13.6      | 0         | 4.6       | 0         | 0.9 <sup>b</sup>  | B         |
| 11, 1              | 2.5                    | 81.3     | 17.6     | 0         | 0         | 0         | 0.6       | 0.6       | 0                 | A         |
| 11, 2              | 2.5                    | 80.6     | 15.5     | 0         | 0         | 0         | 1.2       | 1.4       | 1.4 <sup>c</sup>  | A         |
| 11, 3              | 2.5                    | 79.4     | 17.6     | 0         | 0         | 0         | 1.3       | 1         | 0.7 <sup>d</sup>  | A         |
| 12, 1              | 4.4                    | 56.3     | 37.1     | 5.5       | 0         | 0         | 0         | 0.3       | 0.7 <sup>e</sup>  | E         |
| 12, 2              | 4.4                    | 58.8     | 35.1     | 5.3       | 0         | 0         | 0         | 0         | 0.8 <sup>f</sup>  | E         |
| 12, 3              | 4.4                    | 26.7     | 60.4     | 1.1       | 0         | 0         | 0.9       | 0         | 0.8 <sup>g</sup>  | E         |
| 12, 4              | 4.4                    | 34.4     | 53.6     | 11.2      | 0         | 0         | 0         | 0         | 0.8 <sup>h</sup>  | E         |
| 13, 1              | 9.0                    | 59.6     | 5.9      | 0         | 3.8       | 0         | 0         | 0         | 30.8 <sup>i</sup> | B         |
| 13, 2              | 9.0                    | 62.6     | 10.3     | 0         | 8.6       | 0         | 0         | 0         | 18.4 <sup>j</sup> | B         |
| 14, 1              | 2.6                    | 79.5     | 0        | 0         | 0         | 20.5      | 0         | 0         | 0                 | C         |
| 15, 1              | 9.0                    | 38.0     | 8.4      | 0         | 0         | 53.7      | 0         | 0         | 0                 | C         |
| 16, 1              | 10.0                   | 96.0     | 3.5      | 0         | 0         | 0         | 0         | 0         | 0.5 <sup>k</sup>  | A         |
| 17, 1              | 6.0                    | 21.4     | 55.3     | 11.2      | 11.9      | 0         | 0         | 0         | 0                 | B         |
| 18, 1              | 10.0                   | 11.4     | 62.4     | 12.7      | 13.6      | 0         | 0         | 0         | 0                 | B         |

% = mol%. A: Non Si polymers. B: Si paints. C: Cu paints. D: Other paints. E: Al coating laminate films. F: Shell.

<sup>a)</sup> Mg = 0.4, Au = 0.3%   <sup>b)</sup> Au = 0.9%   <sup>c)</sup> Au = 1.4%   <sup>d)</sup> Au = 0.7%   <sup>e)</sup> Mo = 0.7%   <sup>f)</sup> S = 0.9%   <sup>g)</sup> Au = 0.8%

<sup>h)</sup> Mo = 0.8%   <sup>i)</sup> Fe = 30.7%   <sup>j)</sup> Fe = 17.4%, Au = 1.0%   <sup>k)</sup> Au = 0.5%

TableS 1-3 Results of S1-B sample long diameter (d), EDX analysis and materials

| No, analy.<br>spot | d<br>(μm) | C<br>(%) | O<br>(%) | Al<br>(%) | Si<br>(%) | Cu<br>(%) | Na<br>(%) | Cl<br>(%) | Others<br>(%)    | Materials |
|--------------------|-----------|----------|----------|-----------|-----------|-----------|-----------|-----------|------------------|-----------|
| 19, 1              | 7.0       | 23.2     | 52.6     | 3.5       | 18.2      | 0         | 1.2       | 0         | 1.3 <sup>a</sup> | B         |
| 20, 1              | 9.0       | 11.4     | 62.4     | 12.7      | 13.6      | 0         | 0         | 0         | 0                | B         |
| 20, 2              | 9.0       | 12.0     | 60.8     | 13.3      | 13.9      | 0         | 0         | 0         | 0                | B         |

% = mol%. A: Non Si polymers. B: Si paints. C: Cu paints. D: Other paints. E: Al coating laminate films. F: Shell.

<sup>a)</sup> K = 1.3%

TableS 1-4 Results of S1-B sample long diameter (d) and EDX analysis and materials

| No, analy.<br>spot | d<br>( $\mu\text{m}$ ) | C<br>(%) | O<br>(%) | Al<br>(%) | Si<br>(%) | Cu<br>(%) | Na<br>(%) | Cl<br>(%) | Others<br>(%)     | Materials |
|--------------------|------------------------|----------|----------|-----------|-----------|-----------|-----------|-----------|-------------------|-----------|
| 21, 1              | 28.0                   | 73.4     | 21.6     | 0         | 0         | 1.1       | 1.7       | 1.4       | 0.8 <sup>a</sup>  | C         |
| 21, 2              | 28.0                   | 72.4     | 24.3     | 0         | 0.4       | 0.8       | 0         | 1.3       | 0.8 <sup>b</sup>  | C         |
| 22, 1              | 29.4                   | 0        | 58.9     | 8.4       | 24.7      | 0         | 2.3       | 0         | 5.7 <sup>c</sup>  | B         |
| 22, 2              | 29.4                   | 34.8     | 41.8     | 4.8       | 14.0      | 0         | 1.3       | 0         | 3.2 <sup>d</sup>  | B         |
| 23, 1              | 0.7                    | 86.2     | 13.1     | 0         | 0         | 0         | 0         | 0         | 0.7               | A         |
| 24, 1              | 5.5                    | 62.2     | 29.4     | 0         | 0         | 0         | 0.7       | 0         | 7.7 <sup>e</sup>  | A*        |
| 25, 1              | 3.3                    | 85.2     | 13.6     | 0         | 0.3       | 0         | 0         | 0.3       | 0                 | A         |
| 26, 1              | 21.4                   | 84.4     | 15.1     | 0         | 0.2       | 0         | 0.3       | 0         | 0                 | A         |
| 27, 1              | 13.6                   | 84.9     | 11.8     | 0         | 0.3       | 0         | 1.6       | 1.2       | 0.3 <sup>f</sup>  | A         |
| 28, 1              | 1.8                    | 35.1     | 50.0     | 0         | 14.3      | 0         | 0.6       | 0         | 0                 | B         |
| 29, 1              | 4.3                    | 43.7     | 43.2     | 0         | 11.8      | 0         | 0.9       | 0.2       | 0.2 <sup>g</sup>  | B         |
| 30, 1              | 5.2                    | 89.4     | 7.7      | 0         | 0         | 0         | 0         | 0         | 2.9 <sup>h</sup>  | A         |
| 31, 1              | 9.8                    | 40.6     | 50.0     | 0         | 0         | 0         | 0         | 0         | 9.5 <sup>i</sup>  | F         |
| 32, 1              | 5.1                    | 50.6     | 37.3     | 2.5       | 6.7       | 0         | 0.5       | 0.4       | 2.1 <sup>j</sup>  | B         |
| 33, 1              | 1.6                    | 85.3     | 9.1      | 0         | 0         | 0         | 3.3       | 2.3       | 0                 | A         |
| 34, 1              | 15.0                   | 26.7     | 51.7     | 0         | 0         | 0         | 0         | 0         | 21.6 <sup>k</sup> | F         |
| 35, 1              | 13.2                   | 87.5     | 10.2     | 0         | 0.3       | 0         | 1.1       | 0.7       | 0.3 <sup>l</sup>  | A         |
| 36, 1              | 21.2                   | 85.4     | 11.1     | 0         | 0         | 1.4       | 0         | 0         | 2.1 <sup>m</sup>  | C         |
| 37, 1              | 12.8                   | 24.1     | 2.2      | 0         | 0         | 46.8      | 0         | 0         | 26.8 <sup>n</sup> | C         |

% = mol%. A: Non Si polymers. B: Si paints. C: Cu paints. D: Other paints. E: Al coating laminate films. F: Shell.

<sup>a</sup>) MoS<sub>2</sub> lubricant contamination    <sup>a</sup>) K = 0.5%, Mo = 0.3%    <sup>b</sup>) K = 0.5%, S = 0.4%    <sup>c</sup>) K = 0.7%    <sup>d</sup>) K = 3.2%    <sup>e</sup>) Mg = 0.2%, S = 3.6%, K = 0.4, Ca = 0.4, Cr = 0.3, Fe = 1.9, Mo = 1.0    <sup>f</sup>) K = 0.3%    <sup>g</sup>) S = 0.2%    <sup>h</sup>) K = 1.4%, S = 1.5%    <sup>i</sup>) Ca = 9.5%    <sup>j</sup>) K = 2.1%    <sup>k</sup>) Mg = 9.8%, Ca = 11.9    <sup>l</sup>) K = 0.3%    <sup>m</sup>) S = 1.4%, Ca = 0.7%    <sup>n</sup>) Zn = 26.8%

TableS 1-5 Results of S1-B sample long diameter (d), EDX analysis and materials

| No, analy.<br>spot | d<br>(μm) | C<br>(%) | O<br>(%) | Al<br>(%) | Si<br>(%) | Cu<br>(%) | Na<br>(%) | Cl<br>(%) | Others<br>(%)     | Materials |
|--------------------|-----------|----------|----------|-----------|-----------|-----------|-----------|-----------|-------------------|-----------|
| 38, 1              | 3.1       | 88.1     | 3.4      | 0         | 0         | 0         | 4.8       | 3.7       | 0                 | A         |
| 39, 1              | 2.0       | 87.1     | 2.7      | 0         | 0         | 0         | 5.7       | 4.5       | 0                 | A         |
| 40, 1              | 4.9       | 79.0     | 0        | 0         | 0         | 0         | 11.4      | 9.6       | 0                 | A         |
| 41, 1              | 4.9       | 26.0     | 2.0      | 0         | 0         | 45.3      | 0         | 0         | 26.7 <sup>a</sup> | C         |
| 42, 1              | 3.0       | 77.3     | 3.7      | 0         | 0         | 11.9      | 0         | 0         | 7.2 <sup>b</sup>  | C         |
| 43, 1              | 26.9      | 77.5     | 16.4     | 0         | 0         | 0         | 4.2       | 1.8       | 0.2 <sup>c</sup>  | A         |
| 43, 2              | 26.9      | 76.1     | 15.2     | 0         | 0         | 0         | 5.0       | 3.0       | 0.5 <sup>d</sup>  | A         |

% = mol%. A: Non Si polymers. B: Si paints. C: Cu paints. D: Other paints. E: Al coating laminate films. F: Shell.

<sup>a)</sup> Zn = 26.7%   <sup>b)</sup> Zn = 7.2%   <sup>c)</sup> Mo = 0.2%   <sup>d)</sup> S = 0.3%,   K = 0.3%

TableS 2-1 Results of S1-D sample long diameter (d), EDX analysis and materials

| No, analy.<br>spot | d<br>( $\mu\text{m}$ ) | C<br>(%) | O<br>(%) | Al<br>(%) | Si<br>(%) | Cu<br>(%) | Na<br>(%) | Cl<br>(%) | Others<br>(%)    | Materials       |
|--------------------|------------------------|----------|----------|-----------|-----------|-----------|-----------|-----------|------------------|-----------------|
| 1, 1               | 13.0                   | 10.2     | 58.1     | 5.1       | 24.5      | 0         | 0         | 0         | 2.1 <sup>a</sup> | B               |
| 2, 1               | 15.0                   | 85.1     | 14.5     | 0         | 0         | 0         | 0         | 0.4       | 0                | A               |
| 3, 1               | 18.0                   | 99.0     | 0        | 0         | 0         | 0         | 0         | 1.0       | 0                | A               |
| 4, 1               | 53.0                   | 65.3     | 20.7     | 13.3      | 0.7       | 0         | 0         | 0         | 0                | E               |
| 5, 1               | 24.0                   | 64.5     | 29.5     | 0         | 0         | 0         | 1.5       | 2.8       | 1.7 <sup>b</sup> | A               |
| 6, 1               | 10.0                   | 77.0     | 18.0     | 0.5       | 1.6       | 0         | 0         | 2.0       | 0.9 <sup>c</sup> | B               |
| 7, 1               | 14.0                   | 50.2     | 44.5     | 0         | 5.4       | 0         | 0         | 0         | 0                | B               |
| 8, 1               | 19.1                   | 38.4     | 46.4     | 0         | 13.5      | 0         | 1.1       | 0.6       | 0                | B               |
| 9, 1               | 21.8                   | 81.1     | 13.8     | 0         | 0         | 0         | 2.7       | 1.5       | 0.9 <sup>d</sup> | A               |
| 10, 1              | 10.0                   | 60.2     | 34.0     | 0.6       | 3.2       | 0         | 0         | 0         | 2.1 <sup>e</sup> | B               |
| 11, 1              | 40.0                   | 74.6     | 21.5     | 0.5       | 0.8       | 0         | 0         | 0         | 2.5 <sup>f</sup> | A               |
| 12, 1              | 5.3                    | 61.6     | 32.7     | 1.1       | 1.5       | 0         | 0         | 0         | 3.2 <sup>g</sup> | B               |
| 13, 1              | 13.3                   | 66.2     | 20.6     | 2.4       | 4.2       | 0         | 0         | 0         | 6.7 <sup>h</sup> | B               |
| 14, 1              | 6.0                    | 54.5     | 33.1     | 5.4       | 5.7       | 0         | 0         | 0         | 1.4 <sup>i</sup> | B               |
| 15, 1              | 12.3                   | 62.8     | 30.3     | 0         | 1.5       | 0         | 0         | 0         | 5.5 <sup>j</sup> | B               |
| 16, 1              | 17.3                   | 69.1     | 28.4     | 0         | 0         | 0         | 1.4       | 1.1       | 0                | A               |
| 16, 2              | 17.3                   | 46.3     | 38.1     | 0         | 14.9      | 0         | 0         | 0         | 0.8 <sup>k</sup> | -- <sup>l</sup> |

% = mol%. A: Non Si polymers. B: Si paints. C: Cu paints. D: Other paints. E: Al coating laminate films. F: Shell.

<sup>a)</sup> K = 1.4%, Au = 0.7%   <sup>b)</sup> K = 1.7%   <sup>c)</sup> Mg = 0.4%, Au = 0.5%   <sup>d)</sup> K = 0.9%   <sup>e)</sup> Ca = 1.2%, Au = 0.9%   <sup>f)</sup> Ca = 1.5%, Au = 1.0%   <sup>g)</sup> Ca = 2.1%, Au = 1.1%   <sup>h)</sup> Ca = 5.1%, Au = 1.6%   <sup>i)</sup> Ca = 1.4%   <sup>j)</sup> Ca = 4.8%, Au = 0.7%

<sup>k)</sup> Ca = 0.8%   <sup>l)</sup> Diatom



TableS 2-2 Results of S1-D sample long diameter (d), EDX analysis and materials

| No, analy. spot | d (μm) | C (%) | O (%) | Al (%) | Si (%) | Cu (%) | Na (%) | Cl (%) | Others (%)        | Materials |
|-----------------|--------|-------|-------|--------|--------|--------|--------|--------|-------------------|-----------|
| 17, 1           | 22.0   | 20.1  | 56.0  | 0.8    | 20.7   | 0      | 0.8    | 0      | 1.7 <sup>a</sup>  | B         |
| 17, 2           | 22.0   | 18.2  | 61.2  | 0      | 18.7   | 0      | 0.9    | 0.4    | 1.0 <sup>b</sup>  | B         |
| 17, 3           | 22.0   | 31.4  | 52.1  | 0      | 15.7   | 0      | 0.8    | 0      | 0                 | B         |
| 17, 4           | 22.0   | 14.5  | 31.6  | 0      | 52.3   | 0      | 0      | 0      | 1.6 <sup>c</sup>  | B         |
| 18 1            | 9.3    | 21.6  | 58.4  | 0      | 19.4   | 0      | 0.9    | 0      | 0                 | B         |
| 19, 1           | 22.0   | 44.6  | 42.9  | 2.0    | 9.5    | 0      | 0.6    | 0      | 0.4 <sup>d</sup>  | B         |
| 19, 2           | 22.0   | 76.8  | 12.6  | 1.0    | 9.2    | 0      | 0      | 0      | 0.5 <sup>e</sup>  | B         |
| 20, 1           | 1.4    | 56.9  | 35.3  | 1.2    | 5.3    | 0      | 0.6    | 0      | 0.6 <sup>f</sup>  | B         |
| 21, 1           | 40.0   | 75.8  | 20.5  | 1.0    | 2.7    | 0      | 0      | 0      | 0                 | B         |
| 22, 1           | 4.1    | 0     | 17.9  | 7.5    | 24.0   | 0      | 0      | 0      | 50.5 <sup>g</sup> | B         |
| 23, 1           | 19.0   | 19.0  | 53.5  | 2.3    | 22.4   | 0      | 1.0    | 0      | 1.9 <sup>h</sup>  | B         |
| 24, 1           | 5.1    | 87.0  | 13.0  | 0      | 0      | 0      | 0      | 0      | 0                 | A         |
| 25, 1           | 34.0   | 45.6  | 44.0  | 0      | 0      | 0      | 0      | 0      | 10.4 <sup>i</sup> | A(F)      |
| 25, 2           | 34.0   | 61.1  | 31.9  | 0      | 0.9    | 0      | 5.4    | 0      | 0.7 <sup>j</sup>  | A         |
| 26, 1           | 0.8    | 90.7  | 9.4   | 0      | 0      | 0      | 0      | 0      | 0                 | A         |
| 27, 1           | 5.8    | 73.9  | 16.4  | 0      | 0      | 9.7    | 0      | 0      | 0                 | C         |

% = mol%. A: Non Si polymers. B: Si paints. C: Cu paints. D: Other paints. E: Al coating laminate films. F: Shell.

<sup>a)</sup> Mg = 1.7%   <sup>b)</sup> Au = 1.0%   <sup>c)</sup> S = 1.6   <sup>d)</sup> Au = 0.4%   <sup>e)</sup> Au = 0.5%   <sup>f)</sup> Au = 0.6%   <sup>g)</sup> Mg = 8.4%, Ca = 10.0%, Fe=28.9, Au = 3.3%   <sup>h)</sup> Mg = 0.9%, Au = 0.9%   <sup>i)</sup> Ca = 9.7%, Au = 0.7%   <sup>j)</sup> Au = 0.7%

TableS 2-3 Results of S1-D sample long diameter (d), EDX analysis and materials

| No, analy.<br>spot | d<br>( $\mu\text{m}$ ) | C<br>(%) | O<br>(%) | Al<br>(%) | Si<br>(%) | Cu<br>(%) | Na<br>(%) | Cl<br>(%) | Others<br>(%)     | Materials |
|--------------------|------------------------|----------|----------|-----------|-----------|-----------|-----------|-----------|-------------------|-----------|
| 28, 1              | 4.3                    | 45.8     | 2.2      | 0         | 0         | 34.0      | 0         | 0         | 18.0 <sup>a</sup> | C         |
| 29, 1              | 10.2                   | 29.9     | 2.3      | 0         | 0         | 43.8      | 0         | 0         | 24.0 <sup>b</sup> | C         |
| 30, 1              | 7.5                    | 16.1     | 2.2      | 0         | 0         | 51.7      | 0.8       | 0         | 28.8 <sup>c</sup> | C         |
| 31, 1              | 6.0                    | 0        | 0        | 0         | 0         | 64.9      | 0         | 0         | 35.1 <sup>d</sup> | C         |
| 32, 1              | 5.7                    | 45.1     | 2.4      | 0         | 0         | 33.1      | 0         | 0         | 19.4 <sup>e</sup> | C         |
| 33, 1              | 8.6                    | 31.6     | 1.8      | 0         | 0         | 43.8      | 0         | 0         | 22.8 <sup>f</sup> | C         |
| 34, 1              | 8.0                    | 15.3     | 3.8      | 1.9       | 0         | 47.4      | 0         | 0         | 31.7 <sup>g</sup> | C         |
| 35, 1              | 1.4                    | 26.1     | 0        | 0         | 0         | 48.9      | 0         | 0         | 25.0 <sup>h</sup> | C         |
| 36, 1              | 57.5                   | 75.4     | 15.9     | 1.3       | 4.0       | 0         | 1.0       | 1.5       | 0.9 <sup>i</sup>  | B         |
| 36, 2              | 57.5                   | 82.3     | 13.3     | 0         | 0.2       | 0         | 1.3       | 2.2       | 0.6 <sup>j</sup>  | A         |
| 37, 1              | 11.4                   | 89.8     | 9.9      | 0         | 0         | 0         | 0         | 0.3       | 0                 | A         |
| 37, 2              | 11.4                   | 83.0     | 16.4     | 0         | 0         | 0         | 0.4       | 0.3       | 0                 | A         |
| 37, 3              | 11.4                   | 87.4     | 11.3     | 0         | 0         | 0         | 0.7       | 0.6       | 0                 | A         |
| 38, 1              | 5.9                    | 79.7     | 18.0     | 0         | 0         | 0         | 1.1       | 0.8       | 0.4 <sup>k</sup>  | A         |
| 39, 1              | 26.7                   | 81.5     | 16.2     | 0         | 0         | 0         | 1.0       | 1.0       | 0.2 <sup>l</sup>  | A         |
| 39, 2              | 26.7                   | 77.5     | 20.1     | 0         | 0         | 0         | 1.2       | 0.9       | 0.3 <sup>m</sup>  | A         |
| 40, 1              | 9.2                    | 87.4     | 12.6     | 0         | 0         | 0         | 0         | 0         | 0                 | A         |

% = mol%. A: Non Si polymers. B: Si paints. C: Cu paints. D: Other paints. E: Al coating laminate films. F: Shell.

<sup>a)</sup> Zn = 18.0%   <sup>b)</sup> Zn = 24.0%   <sup>c)</sup> Zn = 28.8%   <sup>d)</sup> Zn = 35.1%   <sup>e)</sup> Zn = 19.4%   <sup>f)</sup> Zn = 22.8%   <sup>g)</sup> Zn = 31.2%, Pb = 0.5%   <sup>h)</sup> Zn = 25.0%   <sup>i)</sup> K = 0.9%   <sup>j)</sup> Mg = 0.2%, Cr = 0.3   <sup>k)</sup> Cr = 0.4%   <sup>l)</sup> Mg = 0.2%   <sup>m)</sup> Mg = 0.2%

TableS 2-4 Results of S1-D sample long diameter (d), EDX analysis and materials

| No, analy. spot | d (μm) | C (%) | O (%) | Al (%) | Si (%) | Cu (%) | Na (%) | Cl (%) | Others (%)        | Materials |
|-----------------|--------|-------|-------|--------|--------|--------|--------|--------|-------------------|-----------|
| 41, 1           | 0.9    | 71.2  | 25.7  | 1.0    | 1.3    | 0      | 0      | 0      | 0.8 <sup>a</sup>  | B         |
| 42, 1           | 3.7    | 81.1  | 18.5  | 0      | 0.4    | 0      | 0      | 0      | 0                 | A         |
| 43, 1           | 5.0    | 68.9  | 26.3  | 1.5    | 2.6    | 0      | 0      | 0      | 0.8 <sup>b</sup>  | B         |
| 44, 1           | 1.8    | 84.9  | 14.6  | 0      | 0.5    | 0      | 0      | 0      | 0                 | A         |
| 45, 1           | 7.5    | 87.9  | 11.8  | 0      | 0.4    | 0      | 0      | 0      | 0                 | A         |
| 46, 1           | 6.2    | 51.4  | 40.2  | 0.4    | 7.4    | 0      | 0.6    | 0      | 0                 | B         |
| 47, 1           | 3.5    | 48.5  | 42.3  | 0.4    | 7.3    | 0      | 0      | 0.2    | 0                 | B         |
| 48, 1           | 5.8    | 55.6  | 34.6  | 2.0    | 3.5    | 0      | 0      | 0      | 4.4 <sup>c</sup>  | B         |
| 49, 1           | 8.7    | 63.5  | 30.2  | 1.1    | 2.3    | 0      | 0.4    | 0.3    | 2.3 <sup>d</sup>  | B         |
| 50, 1           | 6.0    | 47.5  | 38.9  | 1.5    | 12.2   | 0      | 0      | 0      | 0                 | B         |
| 51, 1           | 9.6    | 86.0  | 13.4  | 0      | 0.6    | 0      | 0      | 0      | 0                 | A         |
| 52, 1           | 4.0    | 84.7  | 15.3  | 0      | 0      | 0      | 0      | 0      | 0                 | A         |
| 53, 1           | 6.0    | 42.0  | 44.4  | 6.2    | 6.8    | 0      | 0      | 0      | 0.6 <sup>e</sup>  | B         |
| 54, 1           | 7.1    | 74.7  | 20.0  | 1.5    | 3.0    | 0      | 0.4    | 0.2    | 0.2 <sup>f</sup>  | B         |
| 55, 1           | 11.5   | 22.0  | 6.5   | 0      | 0      | 0      | 1.0    | 1.0    | 71.5 <sup>g</sup> | D*        |
| 56, 1           | 30.7   | 72.4  | 13.6  | 0      | 1.1    | 0      | 3.0    | 5.6    | 4.3 <sup>h</sup>  | B         |
| 57, 1           | 12.3   | 52.2  | 27.9  | 1.4    | 6.4    | 0      | 3.0    | 2.0    | 7.1 <sup>i</sup>  | B         |

% = mol%. A: Non Si polymers. B: Si paints. C: Cu paints. D: Other paints. E: Al coating laminate films. F: Shell.

<sup>a</sup>) MoS<sub>2</sub> lubricant contamination    <sup>a</sup>) Fe = 0.8%    <sup>b</sup>) Mg = 0.3%, K = 0.4%    <sup>c</sup>) Mg = 2.1%, K = 0.8%, Fe = 1.53%    <sup>d</sup>) Mg = 1.2%, K = 0.4%, Fe = 0.7%    <sup>e</sup>) Fe = 0.6%    <sup>f</sup>) K = 0.2%    <sup>g</sup>) S = 23.3%, K = 38.0%, Mo = 10.1    <sup>h</sup>) S = 1.3%, K = 2.0%, Mg = 0.4, Ca = 0.5    <sup>i</sup>) S = 0.9%, K = 1.2%, Mg = 1.8, Ca = 2.1, Fe = 1

TableS 2-5 Results of S1-D sample long diameter (d), EDX analysis and materials

| No, analy.<br>spot | d<br>(μm) | C<br>(%) | O<br>(%) | Al<br>(%) | Si<br>(%) | Cu<br>(%) | Na<br>(%) | Cl<br>(%) | Others<br>(%) | Materials |
|--------------------|-----------|----------|----------|-----------|-----------|-----------|-----------|-----------|---------------|-----------|
| 58, 1              | 7.0       | 78.8     | 19.3     | 0         | 1.2       | 0         | 0.6       | 0.2       | 0             | B         |
| 59, 1              | 7.1       | 80.2     | 18.9     | 0         | 0.7       | 0         | 0         | 0.2       | 0             | A         |

% = mol%. A: Non Si polymers. B: Si paints. C: Cu paints. D: Other paints. E: Al coating laminate films. F: Shell.

TableS 3-1 Results of S3-B sample long diameter (d), EDX analysis and materials

| No, analy.<br>spot | d<br>( $\mu\text{m}$ ) | C<br>(%) | O<br>(%) | Al<br>(%) | Si<br>(%) | Cu<br>(%) | Na<br>(%) | Cl<br>(%) | Others<br>(%)     | Materials |
|--------------------|------------------------|----------|----------|-----------|-----------|-----------|-----------|-----------|-------------------|-----------|
| 1, 1               | 9.3                    | 25.5     | 0        | 0         | 0         | 47.1      | 0         | 0         | 27.5 <sup>a</sup> | C         |
| 2, 1               | 6.4                    | 68.6     | 6.9      | 0         | 0         | 14.8      | 0         | 0         | 9.7 <sup>b</sup>  | C         |
| 3, 1               | 5.4                    | 69.1     | 26.4     | 0.8       | 2.3       | 0         | 0.6       | 0.3       | 0.6 <sup>c</sup>  | B         |
| 4, 1               | 4.2                    | 50.2     | 39.6     | 0         | 8.2       | 0         | 0.5       | 0.1       | 1.4 <sup>d</sup>  | B         |
| 5, 1               | 6.2                    | 60.6     | 33.7     | 0         | 5.8       | 0         | 0         | 0         | 0                 | B         |
| 6, 1               | 2.0                    | 86.6     | 10.5     | 0         | 0         | 0.89      | 0         | 0.9       | 1.1 <sup>e</sup>  | A         |
| 7, 1               | 10.0                   | 0        | 0        | 0         | 0         | 64.9      | 0         | 0         | 35.1 <sup>f</sup> | C         |
| 8, 1               | 2.5                    | 87.8     | 11.9     | 0         | 0         | 0         | 0         | 0         | 0.3 <sup>g</sup>  | A         |
| 9, 1               | 75.0                   | 72.3     | 20.8     | 0         | 0         | 0         | 3.2       | 3.3       | 0.4 <sup>h</sup>  | A         |
| 10, 1              | 100.0                  | 71.7     | 22.3     | 0         | 0         | 0         | 2.9       | 3.2       | 0.5 <sup>i</sup>  | A         |
| 10, 2              | 100.0                  | 87.4     | 12.6     | 0         | 0         | 0         | 0         | 0         | 0                 | A         |

% = mol%. A: Non Si polymers. B: Si paints. C: Cu paints. D: Other paints. E: Al coating laminate films. F: Shell.

<sup>a)</sup> Zn = 26.6%, Au = 0.9%   <sup>b)</sup> Zn = 8.2%, Sb = 1.5%   <sup>c)</sup> Fe = 0.6%   <sup>d)</sup> Cr = 0.9%, Au = 0.5%   <sup>e)</sup> K = 0.5%, Au = 0.6%   <sup>f)</sup> Zn = 35.1%   <sup>g)</sup> Au = 0.3%   <sup>h)</sup> Mg = 0.4%   <sup>i)</sup> Mg = 0.5%

TableS 3-2 Results of S3-B sample long diameter (d), EDX analysis and materials

| No, analy. spot | d (μm) | C (%) | O (%) | Al (%) | Si (%) | Cu (%) | Na (%) | Cl (%) | Others (%)        | Materials |
|-----------------|--------|-------|-------|--------|--------|--------|--------|--------|-------------------|-----------|
| 11, 1           | 7.5    | 30.3  | 45.7  | 0      | 0      | 0      | 4.6    | 0.5    | 18.9 <sup>a</sup> | D*        |
| 12, 1           | 5.0    | 41.0  | 45.1  | 0      | 0      | 0      | 3.1    | 0.3    | 10.5 <sup>b</sup> | D*        |
| 13, 1           | 6.3    | 79.6  | 7.7   | 0      | 0      | 8.1    | 0      | 0      | 4.7 <sup>c</sup>  | C         |
| 14, 1           | 4.0    | 60.9  | 1.6   | 0      | 0      | 24.2   | 0      | 0      | 13.3 <sup>d</sup> | C         |
| 15, 1           | 11.1   | 78.2  | 17.7  | 0      | 0      | 0      | 0.7    | 0      | 3.5 <sup>e</sup>  | A         |
| 15, 2           | 11.1   | 68.5  | 25.7  | 0      | 0      | 0      | 0.9    | 0      | 5.0 <sup>f</sup>  | A         |
| 16, 1           | 13.7   | 76.2  | 4.7   | 0      | 0      | 0      | 8.0    | 10.5   | 0.7 <sup>g</sup>  | A         |
| 16, 2           | 13.7   | 67.5  | 11.9  | 0      | 0      | 0      | 16.1   | 16.3   | 0                 | A         |
| 17, 1           | 1.8    | 77.8  | 19.9  | 0.2    | 0.9    | 0      | 0.4    | 0.3    | 0.6 <sup>h</sup>  | A         |
| 18, 1           | 3.0    | 57.6  | 37.0  | 0.2    | 4.6    | 0      | 0.5    | 0      | 0                 | B         |
| 19, 1           | 1.0    | 77.8  | 20.4  | 0      | 0      | 0      | 0.7    | 0      | 1.1 <sup>i</sup>  | A         |
| 20, 1           | 1.4    | 82.0  | 3.9   | 0      | 0      | 8.9    | 0      | 0      | 5.3 <sup>j</sup>  | C         |
| 21, 1           | 2.9    | 84.2  | 4.4   | 0      | 0      | 7.1    | 0      | 0      | 4.3 <sup>k</sup>  | C         |
| 22, 1           | 5.0    | 39.1  | 0     | 0      | 0      | 35.7   | 0      | 0      | 25.2 <sup>l</sup> | C         |
| 23, 1           | 6.9    | 49.8  | 4.1   | 0      | 0      | 29.8   | 0      | 0      | 16.3 <sup>m</sup> | C         |
| 24.1            | 63.9   | 65.6  | 4.5   | 0      | 0      | 18.7   | 0      | 0      | 11.3 <sup>n</sup> | C         |
| 24.2            | 63.9   | 79.1  | 20.1  | 0      | 0      | 0      | 0      | 0.2    | 0.6 <sup>o</sup>  | --        |

% = mol%. A: Non Si polymers. B: Si paints. C: Cu paints. D: Other paints. E: Al coating laminate films. F: Shell.

<sup>a</sup>) MoS<sub>2</sub> lubricant contamination    <sup>a</sup>) S = 8.4%, K = 0.7%, Ca = 8.1, Mo = 1.7%    <sup>b</sup>) S = 4.5%, K = 0.4%, Ca = 4.6, Mo = 1.1%    <sup>c</sup>) Ca = 0.3%, Zn = 4.4%    <sup>d</sup>) Zn = 12.9%, Au = 0.4%    <sup>e</sup>) S = 1.7%, Ca = 1.8%    <sup>f</sup>) S = 2.6%, Ca = 2.4%  
<sup>g</sup>) S = 0.3%, Ca = 0.3%    <sup>h</sup>) Ti = 0.2%, Au = 0.3%    <sup>i</sup>) S = 0.6%, Ca = 0.4%    <sup>j</sup>) Zn = 5.3%    <sup>k</sup>) Zn = 4.3%    <sup>l</sup>) Zn = 25.2%    <sup>m</sup>) Zn = 16.3%    <sup>n</sup>) Zn = 10.8%, Au = 0.4%    <sup>o</sup>) Ca = 0.4%, Au = 0.2%



TableS 3-3 Results of S3-B sample long diameter (d), EDX analysis and materials

| No, analy. spot | d (μm) | C (%) | O (%) | Al (%) | Si (%) | Cu (%) | Na (%) | Cl (%) | Others (%)        | Materials |
|-----------------|--------|-------|-------|--------|--------|--------|--------|--------|-------------------|-----------|
| 25, 1           | 11.4   | 74.5  | 14.9  | 0      | 0.3    | 0      | 2.5    | 4.0    | 3.8 <sup>a</sup>  | A         |
| 26, 1           | 5.0    | 78.7  | 18.3  | 0.3    | 0.7    | 0      | 0.9    | 0.3    | 0.9 <sup>b</sup>  | A         |
| 27, 1           | 5.7    | 85.5  | 12.0  | 0      | 0.3    | 8.1    | 0.8    | 0.5    | 1.0 <sup>c</sup>  | C         |
| 28, 1           | 12.5   | 23.9  | 0     | 0      | 0      | 49.4   | 0      | 0      | 26.7 <sup>d</sup> | C         |
| 29, 1           | 1.2    | 75.3  | 3.1   | 0      | 0      | 13.8   | 0      | 0      | 7.8 <sup>e</sup>  | C         |
| 30, 1           | 14.0   | 33.9  | 0     | 0      | 0      | 0      | 0.2    | 0      | 65.9 <sup>f</sup> | A         |
| 31, 1           | 11.0   | 49.3  | 0     | 0      | 0      | 0      | 0      | 0      | 50.8 <sup>g</sup> | A         |
| 32, 1           | 2.9    | 85.6  | 3.4   | 0      | 0      | 6.8    | 0      | 0      | 4.3 <sup>h</sup>  | C         |
| 33, 1           | 8.6    | 20.9  | 1.6   | 0      | 0      | 49.4   | 0      | 0      | 28.1 <sup>i</sup> | C         |
| 34, 1           | 53.8   | 81.6  | 18.1  | 0      | 0      | 0      | 0      | 0      | 0.3 <sup>j</sup>  | A         |
| 34, 2           | 53.8   | 85.3  | 14.7  | 0      | 0      | 0      | 0      | 0      | 0                 | A         |
| 35, 1           | 10.8   | 78.6  | 21.4  | 0      | 0      | 0      | 0      | 0      | 0                 | A         |
| 36, 1           | 21.0   | 58.9  | 13.8  | 0      | 0      | 0      | 14.3   | 11.2   | 1.8 <sup>k</sup>  | A         |
| 36, 2           | 21.0   | 66.2  | 3.7   | 0      | 0      | 0      | 14.1   | 16.0   | 0                 | A         |
| 37, 1           | 5.6    | 60.3  | 0     | 0      | 0      | 0      | 8.7    | 30.8   | 0.3 <sup>l</sup>  | A         |
| 38, 1           | 18.8   | 0     | 0     | 0      | 0      | 0      | 48.4   | 51.6   | 0                 | --*       |
| 39, 1           | 8.8    | 0     | 0     | 0      | 0      | 0      | 47.9   | 52.1   | 0                 | --*       |
| 40, 1           | 14.1   | 35.4  | 0     | 0      | 0      | 0      | 0.5    | 0.3    | 63.8 <sup>m</sup> | A         |

% = mol%. A: Non Si polymers. B: Si paints. C: Cu paints. D: Other paints. E: Al coating laminate films. F: Shell.

<sup>a</sup>) NaCl crystal   <sup>a</sup>) K = 3.8%   <sup>b</sup>) K = 0.5%, Au = 0.4%   <sup>c</sup>) Ca = 0.8%, Au = 0.2%   <sup>d</sup>) Zn = 25.9%, Au = 0.8%   <sup>e</sup>) Zn = 7.8%   <sup>f</sup>) F = 65.7%, Au = 0.2%   <sup>g</sup>) F = 50.8%   <sup>h</sup>) Zn = 4.1%, Au = 0.2%   <sup>i</sup>) Zn = 26.6%, Pb = 1.6%   <sup>j</sup>) Zn = 5.3%   <sup>k</sup>) S = 0.9%, Ca = 0.9%   <sup>l</sup>) Au = 0.3%   <sup>m</sup>) F = 62.5%, Au = 1.3%

TableS 3-4 Results of S3-B sample long diameter (d), EDX analysis and materials

| No, analy.<br>spot | d<br>( $\mu\text{m}$ ) | C<br>(%) | O<br>(%) | Al<br>(%) | Si<br>(%) | Cu<br>(%) | Na<br>(%) | Cl<br>(%) | Others<br>(%)     | Materials |
|--------------------|------------------------|----------|----------|-----------|-----------|-----------|-----------|-----------|-------------------|-----------|
| 41, 1              | 7.9                    | 13.5     | 0        | 0         | 0         | 52.7      | 0         | 1.0       | 32.8 <sup>a</sup> | C         |
| 42, 1              | 44.7                   | 0        | 7.2      | 0         | 0         | 0         | 46.0      | 46.9      | 0                 | --*       |
| 43, 1              | 7.8                    | 50.2     | 39.6     | 0         | 8.2       | 0         | 0.5       | 0.1       | 1.4 <sup>b</sup>  | B         |
| 44, 1              | 6.5                    | 60.6     | 33.7     | 0         | 5.8       | 0         | 0         | 0         | 0                 | B         |

% = mol%. A: Non Si polymers. B: Si paints. C: Cu paints. D: Other paints. E: Al coating laminate films. F: Shell.

<sup>a</sup>) NaCl crystal    <sup>a</sup>) Zn = 31.5%, Au = 1.3%    <sup>b</sup>) Cr = 0.9%, Au = 0.5%

TableS 4-1 Results of S3-D sample long diameter (d), EDX analysis and materials

| No, analy. spot | d (μm) | C (%) | O (%) | Al (%) | Si (%) | Cu (%) | Na (%) | Cl (%) | Others (%)        | Materials |
|-----------------|--------|-------|-------|--------|--------|--------|--------|--------|-------------------|-----------|
| 1, 1            | 6.0    | 25.1  | 53.3  | 0      | 12.2   | 0      | 0      | 0      | 9.5 <sup>a</sup>  | B         |
| 2, 1            | 12.0   | 0     | 55.6  | 0      | 27.8   | 0      | 0      | 0      | 16.6 <sup>b</sup> | B         |
| 3, 1            | 3.6    | 36.0  | 43.2  | 0      | 12.0   | 0      | 0      | 0.1    | 8.7 <sup>c</sup>  | B         |
| 4, 1            | 31.0   | 77.5  | 9.1   | 0      | 0      | 9.2    | 0      | 0      | 4.3 <sup>d</sup>  | C         |
| 5, 1            | 5.0    | 36.5  | 9.0   | 0      | 0      | 35.6   | 0      | 0      | 18.9 <sup>e</sup> | C         |
| 6, 1            | 20.0   | 68.8  | 9.3   | 0      | 0      | 13.3   | 0      | 1.2    | 7.5 <sup>f</sup>  | C         |
| 7, 1            | 15.0   | 0     | 57.8  | 0      | 0      | 26.3   | 0      | 0      | 15.9 <sup>g</sup> | D         |
| 7, 2            | 15.0   | 0     | 62.4  | 0      | 0      | 22.0   | 0      | 0      | 15.6 <sup>h</sup> | D         |
| 8, 1            | 1.8    | 60.2  | 0     | 0      | 0      | 7.2    | 0      | 0      | 32.6 <sup>i</sup> | C         |
| 9, 1            | 2.0    | 0     | 0     | 0      | 0      | 100    | 0      | 0      | 0                 | C         |
| 10, 1           | 12.5   | 76.0  | 13.8  | 0      | 0      | 0      | 0      | 0      | 10.2 <sup>j</sup> | A*        |
| 10, 2           | 12.5   | 65.4  | 17.6  | 0      | 0      | 0      | 0      | 0      | 17.1 <sup>k</sup> | A*        |
| 11, 1           | 14.2   | 0     | 66.3  | 0      | 19.3   | 0      | 0      | 0      | 19.3 <sup>l</sup> | B         |
| 11, 2           | 14.2   | 10.7  | 61.9  | 0      | 14.9   | 0      | 0      | 0      | 12.4 <sup>m</sup> | B         |
| 11, 3           | 14.2   | 35.2  | 50.9  | 0      | 7.7    | 0      | 0      | 0      | 6.3 <sup>n</sup>  | B         |
| 12, 1           | 37.3   | 83.0  | 16.8  | 0      | 0      | 0      | 0      | 0      | 0.2 <sup>o</sup>  | A         |
| 12, 2           | 37.3   | 82.4  | 17.2  | 0      | 0      | 0      | 0.4    | 0      | 0                 | A         |

% = mol%. A: Non Si polymers. B: Si paints. C: Cu paints. D: Other paints. E: Al coating laminate films. F: Shell.

<sup>a</sup>) MoS<sub>2</sub> lubricant contamination    <sup>a</sup>) Mg = 9.5%    <sup>b</sup>) Mg = 16.6%    <sup>c</sup>) Mg = 8.4%, Au = 0.4%    <sup>d</sup>) Zn = 4.3%    <sup>e</sup>) Zn = 18.9%    <sup>f</sup>) Zn = 6.7%, Au = 0.8%    <sup>g</sup>) Mg = 15.9%    <sup>h</sup>) Mg = 15.6%    <sup>i</sup>) Au = 32.6%    <sup>j</sup>) S = 3.4%, K = 5.1%, Mo = 1.7%    <sup>k</sup>) S = 5.9%, K = 8.8%, Mo = 2.4%    <sup>l</sup>) Mg = 19.3%    <sup>m</sup>) Mg = 11.9%, Au = 0.5%    <sup>n</sup>) Mg = 6.3%    <sup>o</sup>) Au = 0.2%

TableS 4-2 Results of S3-D sample long diameter (d), EDX analysis and materials

| No, analy. spot | d (μm) | C (%) | O (%) | Al (%) | Si (%) | Cu (%) | Na (%) | Cl (%) | Others (%)        | Materials |
|-----------------|--------|-------|-------|--------|--------|--------|--------|--------|-------------------|-----------|
| 13, 1           | 7.1    | 49.1  | 34.2  | 0      | 9.9    | 0      | 0      | 0      | 6.9 <sup>a</sup>  | B         |
| 13, 2           | 7.1    | 26.0  | 55.0  | 0      | 10.4   | 0      | 0      | 0      | 8.6 <sup>b</sup>  | B         |
| 14, 1           | 15.0   | 29.5  | 48.0  | 0      | 12.7   | 0      | 0      | 0      | 9.8 <sup>c</sup>  | B         |
| 14, 2           | 15.0   | 32.3  | 46.2  | 0      | 12.5   | 0      | 0      | 0      | 9.1 <sup>d</sup>  | B         |
| 15, 1           | 3.8    | 34.3  | 46.9  | 0      | 18.8   | 0      | 0      | 0      | 0                 | B         |
| 16, 1           | 28.5   | 79.4  | 18.6  | 0      | 0      | 0      | 0      | 0.6    | 1.3 <sup>e</sup>  | A         |
| 16, 2           | 28.5   | 76.2  | 23.8  | 0      | 0      | 0      | 0      | 0      | 0                 | A         |
| 17, 1           | 8.2    | 72.3  | 19.0  | 0      | 0.9    | 0      | 0      | 0      | 7.7 <sup>f</sup>  | B         |
| 17, 2           | 8.2    | 61.1  | 17.5  | 0.4    | 20.6   | 0      | 0      | 0      | 0.4 <sup>g</sup>  | B         |
| 18, 1           | 15.6   | 83.3  | 15.8  | 0      | 0      | 0      | 0      | 0.2    | 0.7 <sup>h</sup>  | A         |
| 19, 1           | 8.5    | 75.4  | 24.3  | 0      | 0      | 0      | 0      | 0.3    | 0                 | A         |
| 19, 2           | 8.5    | 74.6  | 24.7  | 0      | 0      | 0      | 0      | 0.7    | 0                 | A         |
| 20, 1           | 11.1   | 12.7  | 60.0  | 0      | 15.5   | 0      | 0      | 0      | 11.9 <sup>i</sup> | B         |
| 21, 1           | 2.9    | 0     | 0     | 0      | 0      | 100    | 0      | 0      | 12.4              | C         |
| 22, 1           | 1.5    | 59.7  | 33.3  | 0.2    | 5.9    | 0      | 0      | 0      | 0.9 <sup>j</sup>  | B         |
| 23, 1           | 1.1    | 59.7  | 33.3  | 0.2    | 5.9    | 0      | 0      | 0      | 0.9 <sup>k</sup>  | B         |

% = mol%. A: Non Si polymers. B: Si paints. C: Cu paints. D: Other paints. E: Al coating laminate films. F: Shell.

<sup>a</sup>) MoS<sub>2</sub> lubricant contamination    <sup>a</sup>) Mg = 6.9%    <sup>b</sup>) Mg = 8.6%    <sup>c</sup>) Mg = 9.6%, Au = 0.3%    <sup>d</sup>) Mg = 9.1%    <sup>e</sup>) S = 0.7%, Au = 0.6%    <sup>f</sup>) Ca = 7.7%    <sup>g</sup>) Mg = 0.4%    <sup>h</sup>) Mg = 0.3%, S = 0.5%    <sup>i</sup>) Mg = 11.9%    <sup>j</sup>) Ti = 0.7%, Au = 0.2%

<sup>k</sup>) Ti = 0.7%, Au = 0.2%

TableS 5-1 Results of S5-B sample long diameter (d), EDX analysis and materials

| No, analy. spot | d (μm) | C (%) | O (%) | Al (%) | Si (%) | Cu (%) | Na (%) | Cl (%) | Others (%)        | Materials |
|-----------------|--------|-------|-------|--------|--------|--------|--------|--------|-------------------|-----------|
| 1, 1            | 22.0   | 81.6  | 14.1  | 0.4    | 1.0    | 0      | 0.3    | 2.5    | 0.2 <sup>a</sup>  | A         |
| 2, 1            | 2.5    | 69.9  | 5.2   | 0      | 0      | 15.5   | 0      | 0      | 9.4 <sup>b</sup>  | C         |
| 3, 1            | 23.8   | 23.8  | 0     | 0      | 0      | 49.2   | 0      | 0      | 27.1 <sup>c</sup> | C         |
| 3, 2            | 23.8   | 30.6  | 2.6   | 0      | 0      | 43.3   | 0      | 0      | 23.6 <sup>d</sup> | C         |
| 4, 1            | 32.7   | 86.2  | 13.1  | 0      | 0      | 0      | 0      | 0      | 0                 | A         |
| 5, 1            | 4.2    | 66.9  | 23.4  | 0      | 0      | 0      | 1.0    | 0      | 8.7 <sup>e</sup>  | A*        |
| 6, 1            | 15.0   | 87.1  | 12.6  | 0      | 0      | 0      | 0.3    | 0      | 0                 | A         |
| 6, 2            | 15.0   | 83.3  | 11.4  | 1.6    | 2.0    | 0      | 0.8    | 0.2    | 0.8 <sup>f</sup>  | --        |
| 7, 1            | 1.1    | 86.3  | 10.9  | 0      | 0      | 0      | 1.1    | 0.2    | 1.5 <sup>g</sup>  | A         |
| 8, 1            | 20.0   | 0     | 0     | 0      | 0      | 63.1   | 0      | 0      | 36.9 <sup>h</sup> | C         |
| 9, 1            | 2.0    | 69.5  | 24.2  | 0      | 0      | 1.9    | 0      | 0.8    | 3.6 <sup>i</sup>  | C         |
| 10, 1           | 3.0    | 79.5  | 5.1   | 0      | 0      | 9.5    | 0      | 0      | 5.8 <sup>j</sup>  | C         |
| 11, 1           | 4.2    | 34.7  | 0     | 0      | 0      | 28.8   | 0      | 0      | 36.5 <sup>k</sup> | C         |
| 12, 1           | 2.5    | 39.6  | 4.0   | 0      | 0      | 35.1   | 0      | 0      | 21.3 <sup>l</sup> | C         |
| 13, 1           | 6.9    | 34.5  | 3.3   | 0      | 0      | 35.7   | 0      | 0      | 26.5 <sup>m</sup> | C         |
| 14, 1           | 2.8    | 76.5  | 5.5   | 0      | 0      | 11.3   | 0      | 0      | 6.72 <sup>n</sup> | C         |

% = mol%. A: Non Si polymers. B: Si paints. C: Cu paints. D: Other paints. E: Al coating laminate films. F: Shell.

<sup>a</sup>) MoS<sub>2</sub> lubricant contamination    <sup>a</sup>) Mg = 0.2%    <sup>b</sup>) Zn = 9.1%, Pb = 0.4%    <sup>c</sup>) Zn = 27.1%    <sup>d</sup>) Zn = 23.6%    <sup>e</sup>) S = 3.3%, K = 4.2%, Mo = 1.2%    <sup>f</sup>) K = 0.8%    <sup>g</sup>) S = 0.6%, K = 1.0%    <sup>h</sup>) Zn = 36.9%    <sup>i</sup>) S = 1.1%, K = 0.8%, Fe = 1.7%    <sup>j</sup>) Zn = 5.6%, Pb = 0.2%    <sup>k</sup>) F = 7.7%, P = 3.1%, Fe = 8.3%, Zn = 17.4%    <sup>l</sup>) Zn = 21.3%    <sup>m</sup>) F = 1.5%, Fe = 3.6%, Zn = 21.3%    <sup>n</sup>) Zn = 6.3%, Pb = 0.4%

TableS 5-2 Results of S5-B sample long diameter (d), EDX analysis and materials

| No, analy. spot | d (μm) | C (%) | O (%) | Al (%) | Si (%) | Cu (%)           | Na (%) | Cl (%) | Others (%)        | Materials |
|-----------------|--------|-------|-------|--------|--------|------------------|--------|--------|-------------------|-----------|
| 15, 1           | 23.5   | 0     | 4.9   | 0      | 0      | 58.4             | 0      | 0      | 36.8 <sup>a</sup> | C         |
| 16, 1           | 3.0    | 41.4  | 6.9   | 0      | 0      | 31.9             | 0      | 0      | 19.8 <sup>b</sup> | C         |
| 17, 1           | 6.8    | 13.4  | 68.1  | 0      | 0      | 0                | 0      | 0      | 18.5 <sup>c</sup> | D         |
| 18, 1           | 23.3   | 81.6  | 16.1  | 0      | 0      | 2.4 <sup>d</sup> | 0      | 0      | 0                 | C         |
| 19, 1           | 2.0    | 82.1  | 17.8  | 0      | 0      | 0                | 0      | 0      | 0                 | A         |
| 20, 1           | 6.3    | 62.3  | 20.6  | 0      | 0.2    | 0                | 1.0    | 0      | 16.8 <sup>e</sup> | A         |
| 21, 1           | 10.0   | 24.9  | 49.2  | 0      | 0      | 0                | 0.3    | 0      | 25.9 <sup>f</sup> | F*        |
| 22, 1           | 100.0  | 86.0  | 11.9  | 0      | 0      | 1.9              | 0      | 0      | 0.2 <sup>g</sup>  | C         |
| 23, 1           | 3.6    | 76.5  | 2.5   | 0      | 0      | 13.9             | 0      | 0      | 7.1 <sup>h</sup>  | C         |
| 24, 1           | 54.5   | 78.0  | 13.4  | 0      | 1.2    | 0                | 0      | 0.7    | 6.8 <sup>i</sup>  | E         |
| 24, 2           | 54.5   | 80.8  | 15.8  | 0      | 0      | 0                | 0      | 0.3    | 3.6 <sup>j</sup>  | E         |
| 25, 1           | 8.7    | 74.3  | 23.4  | 0      | 1.3    | 0                | 0.3    | 0.2    | 1.2 <sup>k</sup>  | A         |
| 25, 2           | 8.7    | 83.3  | 10.6  | 0      | 0.9    | 0.9              | 0.3    | 0.4    | 3.7 <sup>l</sup>  | A         |
| 26, 1           | 23.3   | 79.8  | 18.5  | 0      | 0.5    | 35.1             | 0.4    | 0.4    | 0.4 <sup>m</sup>  | C         |
| 27, 1           | 11.7   | 44.8  | 38.9  | 0      | 9.5    | 0                | 0      | 0      | 7.0 <sup>n</sup>  | B         |
| 27, 2           | 11.7   | 43.5  | 40.4  | 0      | 9.2    | 0                | 0      | 0      | 6.9 <sup>o</sup>  | B         |

% = mol%. A: Non Si polymers. B: Si paints. C: Cu paints. D: Other paints. E: Al coating laminate films. F: Shell.

<sup>a</sup>) MoS<sub>2</sub> lubricant contamination    <sup>a</sup>) Zn = 33.5%, Pb = 3.3%    <sup>b</sup>) Zn = 18.5%, Pb = 1.3%    <sup>c</sup>) S = 6.3%, K = 2.8%, Fe = 8.7%, Tl = 0.8%    <sup>d</sup>) Cu contamination    <sup>e</sup>) S = 6.0%, Ca = 9.0%, Mo = 1.8%    <sup>f</sup>) S = 9.7%, Ca = 12.9%, Mo = 3.4%    <sup>g</sup>) S = 0.6%, K = 1.0%    <sup>h</sup>) Zn = 7.1%    <sup>i</sup>) P = 2.8%, S = 0.9%, K = 3.1%    <sup>j</sup>) P = 1.5%, S = 0.4%, K = 1.3%    <sup>k</sup>) P = 0.6%, S = 0.2%, K = 0.4%    <sup>l</sup>) P = 1.7%, K = 1.5%, Nb = 0.5%    <sup>m</sup>) Ca = 0.4%    <sup>n</sup>) Mg = 7.0%    <sup>o</sup>) Mg = 6.9%



TableS 5-3 Results of S5-B sample long diameter (d), EDX analysis and materials

| No, analy.<br>spot | d<br>( $\mu\text{m}$ ) | C<br>(%) | O<br>(%) | Al<br>(%) | Si<br>(%) | Cu<br>(%) | Na<br>(%) | Cl<br>(%) | Others<br>(%)    | Materials |
|--------------------|------------------------|----------|----------|-----------|-----------|-----------|-----------|-----------|------------------|-----------|
| 28, 1              | 26.7                   | 81.8     | 17.6     | 0         | 0         | 0         | 0.4       | 0.3       | 0                | A         |
| 29, 1              | 50.0                   | 80.6     | 16.8     | 0         | 0.3       | 0         | 0.8       | 0.7       | 0.8 <sup>a</sup> | A         |
| 29, 2              | 50.0                   | 82.8     | 16.4     | 0         | 0         | 0         | 0.4       | 0.2       | 0.2 <sup>b</sup> | A         |

% = mol%. A: Non Si polymers. B: Si paints. C: Cu paints. D: Other paints. E: Al coating laminate films. F: Shell.

<sup>a)</sup> S = 0.2%, K = 0.5%    <sup>b)</sup> K = 0.2%    <sup>c)</sup> Mg = 7.0%

TableS 5-4 Results of S5-B sample long diameter (d), EDX analysis and materials

| No, analy.<br>spot | d<br>( $\mu\text{m}$ ) | C<br>(%) | O<br>(%) | Al<br>(%) | Si<br>(%) | Cu<br>(%) | Na<br>(%) | Cl<br>(%) | Others<br>(%)     | Materials |
|--------------------|------------------------|----------|----------|-----------|-----------|-----------|-----------|-----------|-------------------|-----------|
| 30, 1              | 7.4                    | 81.1     | 15.2     | 0         | 0.2       | 0         | 1.4       | 0.9       | 1.2 <sup>a</sup>  | A         |
| 31, 1              | 30.4                   | 81.5     | 18.5     | 0         | 0         | 0         | 0         | 0         | 0                 | A         |
| 32, 1              | 8.0                    | 94.2     | 3.5      | 0         | 0         | 2.3       | 0         | 0         | 0                 | C         |
| 33, 1              | 4.2                    | 75.0     | 1.7      | 0         | 0         | 13.1      | 0         | 0         | 10.2 <sup>b</sup> | C         |
| 34, 1              | 26.4                   | 79.2     | 19.1     | 0         | 0         | 0         | 0.8       | 0.5       | 0.4 <sup>c</sup>  | A         |
| 34, 2              | 26.4                   | 75.3     | 22.9     | 0         | 0         | 0         | 0.9       | 0.5       | 0.4 <sup>d</sup>  | A         |
| 35, 1              | 18.3                   | 73.3     | 0        | 0         | 0.9       | 0         | 0.8       | 9.8       | 15.2 <sup>e</sup> | A         |
| 35, 2              | 18.3                   | 74.9     | 14.6     | 0         | 0         | 0         | 0.7       | 4.8       | 5.1 <sup>f</sup>  | A         |
| 36, 1              | 24.0                   | 73.9     | 7.2      | 0         | 0.3       | 0         | 0.8       | 8.3       | 9.5 <sup>g</sup>  | A         |
| 37, 1              | 17.3                   | 55.8     | 33.3     | 1.4       | 8.7       | 0         | 0         | 0.2       | 0.7 <sup>h</sup>  | B         |
| 37, 2              | 17.3                   | 62.1     | 17.6     | 1.6       | 16.4      | 0         | 0         | 0         | 1.9 <sup>i</sup>  | B         |
| 38, 1              | 9.0                    | 32.9     | 40.9     | 3.8       | 20.4      | 0         | 1.0       | 0         | 1.1 <sup>j</sup>  | B         |
| 39, 1              | 20.0                   | 53.1     | 2.9      | 0         | 0         | 28.0      | 0         | 0         | 16.0 <sup>k</sup> | C         |
| 39, 2              | 20.0                   | 65.2     | 3.7      | 0         | 0         | 19.0      | 0         | 0.4       | 12.1 <sup>l</sup> | C         |
| 40, 1              | 10.0                   | 79.5     | 5.5      | 0         | 0         | 0         | 1.8       | 13.0      | 0.1 <sup>m</sup>  | A         |
| 40, 2              | 10.0                   | 46.6     | 0        | 0         | 0         | 0         | 24.4      | 29.0      | 0                 | A         |

% = mol%. A: Non Si polymers. B: Si paints. C: Cu paints. D: Other paints. E: Al coating laminate films. F: Shell.

<sup>a</sup>) MoS<sub>2</sub> lubricant contamination    <sup>a</sup>) K = 0.8%, Ca = 0.4%    <sup>b</sup>) Zn = 9.8%, Au = 0.4%    <sup>c</sup>) K = 0.4%    <sup>d</sup>) K = 0.4%

<sup>e</sup>) S = 6.0%, Ca = 9.0%, Mo = 1.8%    <sup>f</sup>) K = 4.7%, Au = 0.4%    <sup>g</sup>) K = 9.5%    <sup>h</sup>) Mg = 0.3%, K = 0.3%    <sup>i</sup>) K = 0.6%,

Fe = 0.9%, Au = 0.4%    <sup>j</sup>) K = 1.1%    <sup>k</sup>) Zn = 15.3%, Pb = 0.8%    <sup>l</sup>) K = 0.2%, Zn = 11.9%    <sup>m</sup>) Au = 0.1%

TableS 5-5 Results of S5-B sample long diameter (d), EDX analysis and materials

| No, analy. spot | d (μm) | C (%) | O (%) | Al (%) | Si (%) | Cu (%) | Na (%) | Cl (%) | Others (%)        | Materials |
|-----------------|--------|-------|-------|--------|--------|--------|--------|--------|-------------------|-----------|
| 41, 1           | 16.7   | 25.9  | 59.2  | 0.6    | 13.0   | 0      | 1.1    | 0      | 0.3 <sup>a</sup>  | B         |
| 41, 2           | 16.7   | 9.6   | 57.1  | 1.1    | 30.1   | 0      | 1.1    | 0      | 1.1 <sup>b</sup>  | B         |
| 42, 1           | 20.7   | 92.1  | 7.9   | 0      | 0      | 0      | 0      | 0      | 0                 | A         |
| 43, 1           | 8.0    | 79.1  | 15.2  | 0      | 0      | 0      | 0.7    | 2.6    | 2.4 <sup>c</sup>  | A         |
| 43, 2           | 15.5   | 75.8  | 16.1  | 0      | 0      | 0      | 1.1    | 4.1    | 2.9 <sup>d</sup>  | A         |
| 44, 1           | 15.0   | 80.1  | 19.9  | 0      | 0      | 0      | 0      | 0      | 0                 | A         |
| 44, 2           | 15.0   | 81.8  | 18.2  | 0      | 0      | 0      | 0      | 0      | 0                 | A         |
| 45, 1           | 23.3   | 88.1  | 2.2   | 0      | 0      | 5.8    | 0      | 0      | 4.0 <sup>e</sup>  | C         |
| 45, 2           | 23.3   | 89.8  | 1.7   | 0      | 0      | 4.3    | 0.8    | 0.2    | 4.0 <sup>f</sup>  | C         |
| 46, 1           | 18.8   | 45.3  | 2.7   | 0      | 0      | 33.5   | 0      | 0      | 18.5 <sup>g</sup> | C         |
| 46, 2           | 18.8   | 34.2  | 1.5   | 0      | 0      | 41.2   | 0      | 0      | 23.2 <sup>h</sup> | C         |
| 47, 1           | 5.0    | 32.5  | 48.3  | 0      | 10.9   | 0      | 0      | 0      | 8.3 <sup>i</sup>  | B         |
| 48, 1           | 5.4    | 16.9  | 55.6  | 0      | 15.7   | 0      | 0      | 0      | 11.8 <sup>j</sup> | B         |
| 49, 1           | 21.0   | 85.0  | 15.0  | 0      | 0      | 0      | 0      | 0      | 0                 | A         |
| 50, 1           | 2.0    | 81.5  | 18.3  | 0      | 0      | 0      | 0      | 0      | 0.2               | A         |
| 51, 1           | 21.7   | 94.9  | 5.1   | 0      | 0      | 0      | 0      | 0      | 0                 | A         |
| 51, 2           | 21.7   | 94.4  | 5.6   | 0      | 0      | 0      | 0      | 0      | 0                 | A         |
| 52, 1           | 12.5   | 26.1  | 44.8  | 0      | 17.4   | 0      | 0      | 0      | 11.8 <sup>k</sup> | B         |
| 52, 2           | 12.5   | 0     | 63.3  | 0      | 21.3   | 0      | 0      | 0      | 15.4 <sup>l</sup> | B         |

% = mol%. A: Non Si polymers. B: Si paints. C: Cu paints. D: Other paints. E: Al coating laminate films. F: Shell.

<sup>a)</sup> Au = 0.3%   <sup>b)</sup> K = 0.5%, Au = 0.6%   <sup>c)</sup> S = 0.2%, K = 0.4%, Ca = 1.8%   <sup>d)</sup> Ca = 2.9%   <sup>e)</sup> Zn = 3.9%, Au = 0.2%

<sup>f)</sup> S = 0.5%, K = 0.9%, Zn = 2.6%   <sup>g)</sup> Zn = 17.9%, Au = 0.6%   <sup>h)</sup> Zn = 22.9%, Au = 0.3%   <sup>i)</sup> K = 0.6%, Fe = 0.9%,

Au = 0.4%   <sup>j)</sup> Mg = 8.3%   <sup>k)</sup> Mg = 11.8%   <sup>l)</sup> Mg = 15.4+%

TableS 6-1 Results of S5-D sample long diameter (d), EDX analysis and materials

| No, analy.<br>spot | d<br>( $\mu\text{m}$ ) | C<br>(%) | O<br>(%) | Al<br>(%) | Si<br>(%) | Cu<br>(%) | Na<br>(%) | Cl<br>(%) | Others<br>(%)     | Materials |
|--------------------|------------------------|----------|----------|-----------|-----------|-----------|-----------|-----------|-------------------|-----------|
| 1, 1               | 22.0                   | 60.0     | 31.3     | 2.5       | 2.0       | 0         | 0.8       | 1.4       | 2.0 <sup>a</sup>  | B         |
| 2, 1               | 19.0                   | 85.1     | 12.7     | 0.7       | 0         | 0         | 0.4       | 0.7       | 0.5 <sup>b</sup>  | A         |
| 3, 1               | 5.5                    | 31.2     | 53.9     | 0         | 0         | 0         | 0         | 0         | 14.9 <sup>c</sup> | F         |
| 4, 1               | 15.0                   | 65.7     | 6.4      | 0.9       | 25.8      | 0         | 0         | 0         | 1.2 <sup>d</sup>  | B         |
| 4, 2               | 15.0                   | 45.6     | 36.6     | 0.7       | 15.8      | 0         | 0.9       | 0.4       | 0                 | B         |
| 5, 1               | 12.6                   | 78.4     | 13.8     | 0         | 0         | 0         | 3.9       | 3.7       | 0.3 <sup>e</sup>  | A         |
| 6, 1               | 2.0                    | 79.3     | 11.8     | 0         | 0         | 0         | 4.7       | 3.9       | 0.4 <sup>f</sup>  | A         |
| 7, 1               | 23.5                   | 53.1     | 37.4     | 0.4       | 8.4       | 0         | 0.5       | 0         | 0.2 <sup>g</sup>  | B         |
| 7, 2               | 23.5                   | 0        | 68.8     | 1.3       | 28.2      | 0         | 1.6       | 0         | 0                 | B         |
| 8, 1               | 61.5                   | 27.4     | 44.7     | 1.3       | 25.9      | 0         | 0.6       | 0         | 0                 | B         |
| 8, 2               | 61.5                   | 0        | 63.6     | 1.5       | 33.6      | 0         | 1.3       | 0         | 0                 | B         |
| 9, 1               | 26.9                   | 72.9     | 22.1     | 0         | 0         | 0         | 2.1       | 2.3       | 0.6 <sup>h</sup>  | A         |
| 10, 1              | 30.7                   | 73.4     | 20.3     | 0         | 0         | 0         | 3.0       | 2.7       | 0.7 <sup>i</sup>  | A         |
| 11, 1              | 8.0                    | 77.6     | 19.5     | 0         | 0         | 0         | 1.4       | 1.2       | 0.3 <sup>j</sup>  | A         |
| 11, 2              | 8.0                    | 78.0     | 20.0     | 0         | 0         | 0         | 1.2       | 0.9       | 0                 | A         |
| 12, 1              | 1.5                    | 76.2     | 15.1     | 0         | 0         | 0         | 4.4       | 3.8       | 0.4 <sup>k</sup>  | A         |
| 13, 1              | 4.7                    | 65.3     | 7.8      | 0         | 0         | 0         | 14.2      | 12.7      | 0                 | A         |
| 14, 1              | 5.0                    | 77.2     | 6.9      | 0         | 0         | 0         | 7.1       | 8.1       | 0.6 <sup>l</sup>  | A         |

% = mol%. A: Non Si polymers. B: Si paints. C: Cu paints. D: Other paints. E: Al coating laminate films. F: Shell.

<sup>a)</sup> Mg = 0.3%, K = 0.6%, Ca = 0.4%, Mo = 0.6%    <sup>b)</sup> S = 0.2%, Ca = 0.3%    <sup>c)</sup> Ca = 14.9%    <sup>d)</sup> K = 0.6%, Au = 0.6%

<sup>e)</sup> Mg = 0.3%    <sup>f)</sup> Mg = 0.4%    <sup>g)</sup> Au = 0.2%    <sup>h)</sup> Mg = 0.6%    <sup>i)</sup> Mg = 0.7%    <sup>j)</sup> Mg = 0.2%    <sup>k)</sup> Mg = 0.4%    <sup>l)</sup> Zn =

0.2%, Mg = 0.4%

TableS 6-2 Results of S5-D sample long diameter (d), EDX analysis and materials

| No, analy. spot | d (μm) | C (%) | O (%) | Al (%) | Si (%) | Cu (%) | Na (%) | Cl (%) | Others (%)        | Materials |
|-----------------|--------|-------|-------|--------|--------|--------|--------|--------|-------------------|-----------|
| 15, 1           | 40.9   | 85.1  | 14.8  | 0      | 0      | 0      | 0      | 0      | 0.2 <sup>a</sup>  | A         |
| 15, 2           | 40.9   | 88.8  | 10.9  | 0      | 0      | 0      | 0      | 0.2    | 0                 | A         |
| 16, 1           | 6.8    | 39.0  | 44.5  | 0      | 8.1    | 0      | 1.1    | 0.8    | 6.6 <sup>b</sup>  | B         |
| 16, 2           | 6.8    | 55.0  | 32.6  | 0      | 7.0    | 0      | 0      | 0      | 5.4 <sup>c</sup>  | B         |
| 17, 1           | 35.3   | 91.5  | 8.3   | 0      | 0      | 0      | 0      | 0.3    | 0                 | A         |
| 17, 2           | 35.3   | 84.5  | 13.9  | 0      | 0.3    | 0      | 0.     | 0.5    | 0.3 <sup>d</sup>  | A         |
| 18, 1           | 5.8    | 17.4  | 0     | 0      | 0      | 53.0   | 0      | 0      | 29.7 <sup>e</sup> | C         |
| 18, 2           | 5.8    | 36.5  | 3.1   | 0      | 0      | 39.4   | 0      | 0      | 21.0 <sup>f</sup> | C         |
| 19, 1           | 3.5    | 34.0  | 1.6   | 0      | 0      | 39.4   | 0      | 0      | 25.0 <sup>g</sup> | C         |
| 20, 1           | 10.0   | 11.7  | 62.4  | 1.0    | 23.2   | 0      | 0.6    | 0      | 0                 | B         |
| 20, 2           | 10.0   | 52.9  | 37.0  | 0.4    | 8.8    | 0      | 0.8    | 0      | 0                 | B         |
| 21, 1           | 16.0   | 62.5  | 33.8  | 0      | 3.7    | 0      | 0      | 0      | 0                 | B         |
| 22, 1           | 10.7   | 74.7  | 15.3  | 0      | 0      | 0      | 5.5    | 4.2    | 0.4 <sup>h</sup>  | A         |
| 22, 2           | 10.7   | 79.4  | 14.5  | 0      | 0      | 0      | 2.8    | 2.9    | 0.3 <sup>i</sup>  | A         |
| 23, 1           | 4.3    | 47.4  | 7.5   | 0      | 0      | 28.5   | 0      | 0      | 16.5 <sup>j</sup> | C         |
| 24, 1           | 8.3    | 14.1  | 0     | 0      | 0      | 55.8   | 0      | 0      | 30.1 <sup>k</sup> | C         |
| 25, 1           | 5.7    | 25.7  | 0     | 0      | 0      | 43.3   | 0      | 0      | 31.1 <sup>l</sup> | C         |
| 26, 1           | 5.6    | 58.5  | 0     | 0      | 0      | 27.1   | 0      | 0      | 14.4 <sup>m</sup> | C         |
| 27, 1           | 2.9    | 60.8  | 6.9   | 0      | 0.6    | 19.5   | 0      | 0      | 12.2 <sup>n</sup> | C         |

% = mol%. A: Non Si polymers. B: Si paints. C: Cu paints. D: Other paints. E: Al coating laminate films. F: Shell.

<sup>a)</sup> Au = 0.2%   <sup>b)</sup> Mg = 6.6%   <sup>c)</sup> Mg = 5.4%   <sup>d)</sup> K = 0.3%   <sup>e)</sup> Zn = 29.7%   <sup>f)</sup> Zn = 21.0%   <sup>g)</sup> Zn = 23.6%, Pb = 0.7%, Au = 0.7%   <sup>h)</sup> Mg = 0.4%   <sup>i)</sup> Mg = 0.3%   <sup>j)</sup> Zn = 16.5%   <sup>k)</sup> Zn = 30.1%   <sup>l)</sup> Zn = 31.1%   <sup>m)</sup> Zn = 14.4%

TableS 6-3 Results of S5-D sample long diameter (d), EDX analysis and materials

| No, analy. spot | d (μm) | C (%) | O (%) | Al (%) | Si (%) | Cu (%) | Na (%) | Cl (%) | Others (%)        | Materials |
|-----------------|--------|-------|-------|--------|--------|--------|--------|--------|-------------------|-----------|
| 28, 1           | 3.3    | 55.4  | 5.9   | 0      | 0      | 17.7   | 0      | 0      | 21.1 <sup>a</sup> | C         |
| 29, 1           | 8.5    | 16.3  | 57.1  | 0      | 15.1   | 0      | 0      | 0      | 15.5 <sup>b</sup> | B         |
| 29, 2           | 8.5    | 8.2   | 59.8  | 0      | 18.2   | 0      | 0      | 0      | 13.8 <sup>c</sup> | B         |
| 30, 1           | 1.9    | 67.5  | 2.6   | 0      | 0      | 19.0   | 0      | 0      | 11.0 <sup>d</sup> | C         |
| 31, 1           | 3.5    | 36.3  | 3.1   | 0      | 0      | 38.8   | 0      | 0      | 21.8 <sup>e</sup> | C         |
| 32, 1           | 5.0    | 73.2  | 2.5   | 0      | 0      | 14.9   | 0      | 0      | 9.4 <sup>f</sup>  | C         |
| 33, 1           | 4.0    | 86.5  | 6.5   | 0      | 0      | 4.5    | 0      | 0      | 2.5 <sup>g</sup>  | C         |
| 34, 1           | 16.0   | 87.3  | 8.4   | 0.6    | 1.8    | 0      | 0      | 1.2    | 0.8 <sup>h</sup>  | B         |
| 34, 2           | 16.0   | 77.8  | 19.0  | 0.3    | 1.0    | 39.4   | 0.7    | 0.7    | 0.5 <sup>i</sup>  | B         |
| 35, 1           | 9.0    | 71.8  | 4.4   | 0      | 0      | 0      | 13.1   | 10.6   | 0                 | A         |
| 35, 2           | 9.0    | 67.2  | 8.7   | 0      | 0      | 0      | 13.0   | 10.6   | 0.5 <sup>j</sup>  | A         |
| 36, 1           | 8.0    | 17.3  | 56.9  | 0      | 14.3   | 0      | 0      | 0      | 11.5 <sup>k</sup> | B         |
| 37, 1           | 7.0    | 50.8  | 38.7  | 0      | 4.7    | 0      | 0      | 0      | 4.8 <sup>l</sup>  | B         |
| 38, 1           | 4.0    | 42.0  | 43.2  | 0      | 8.1    | 0      | 0      | 0      | 6.6 <sup>m</sup>  | B         |
| 39, 1           | 14.3   | 78.0  | 17.2  | 0      | 0.3    | 0      | 1.1    | 1.8    | 1.6 <sup>n</sup>  | A         |
| 40, 1           | 30.0   | 70.2  | 20.5  | 0      | 0      | 0      | 6.2    | 2.9    | 0.3 <sup>o</sup>  | A         |
| 40, 2           | 30.0   | 71.5  | 19.5  | 0      | 0      | 0      | 2.7    | 3.4    | 3.0 <sup>p</sup>  | A         |
| 41, 1           | 9.3    | 61.2  | 6.3   | 0      | 0      | 0      | 14.6   | 17.6   | 0.4 <sup>q</sup>  | A         |
| 41, 2           | 9.3    | 37.7  | 4.1   | 0      | 0      | 0      | 30.4   | 27.9   | 0                 | A         |

% = mol%. A: Non Si polymers. B: Si paints. C: Cu paints. D: Other paints. E: Al coating laminate films. F: Shell.

<sup>a)</sup> S = 4.4%, Zn = 10.3%, Pb = 6.4%   <sup>b)</sup> Mg = 6.6%   <sup>c)</sup> Mg = 5.4%   <sup>d)</sup> Zn = 11.0%   <sup>e)</sup> Zn = 21.8%   <sup>f)</sup> Zn = 9.1%, Au = 0.3%   <sup>g)</sup> Zn = 2.5%   <sup>h)</sup> Mg = 0.4%, S = 0.2%, Ca = 0.2%   <sup>i)</sup> Mg = 0.5%   <sup>j)</sup> K = 0.5%   <sup>k)</sup> Mg = 11.5%   <sup>l)</sup> Mg = 4.7%, Au = 0.2%   <sup>m)</sup> Mg = 6.6%, <sup>n)</sup> Zn = 1.6%   <sup>o)</sup> K = 0.3%   <sup>p)</sup> K = 2.7%, Mo = 0.2%   <sup>q)</sup> K = 0.4%



TableS 6-4 Results of S5-D sample long diameter (d), EDX analysis and materials

| No, analy.<br>spot | d<br>( $\mu\text{m}$ ) | C<br>(%) | O<br>(%) | Al<br>(%) | Si<br>(%) | Cu<br>(%) | Na<br>(%) | Cl<br>(%) | Others<br>(%)     | Materials |
|--------------------|------------------------|----------|----------|-----------|-----------|-----------|-----------|-----------|-------------------|-----------|
| 42, 1              | 3.8                    | 51.7     | 33.9     | 0         | 0         | 0         | 0         | 0.7       | 13.7 <sup>a</sup> | A         |
| 43, 1              | 28.5                   | 70.7     | 22.2     | 0         | 0.2       | 0         | 1.3       | 2.4       | 3.3 <sup>b</sup>  | A         |
| 43, 2              | 28.5                   | 75.0     | 23.6     | 0         | 0         | 0         | 0.7       | 0.4       | 0.3 <sup>c</sup>  | A         |
| 44, 1              | 3.6                    | 42.6     | 1.9      | 0         | 0         | 35.2      | 0         | 0         | 20.3 <sup>d</sup> | C         |
| 45, 1              | 7.1                    | 17.8     | 0        | 0         | 0         | 52.3      | 0         | 0         | 29.9 <sup>e</sup> | C         |

% = mol%. A: Non Si polymers. B: Si paints. C: Cu paints. D: Other paints. E: Al coating laminate films. F: Shell.

<sup>a)</sup> Mg = 5.7%, S = 7.6%, TI = 0.4%    <sup>b)</sup> K = 3.1%, Au = 0.2%    <sup>c)</sup> K = 0.3%    <sup>d)</sup> Zn = 19.7%, Au = 0.6%    <sup>e)</sup> Zn = 29.9%

TableS 7-1 Results of S7-B sample long diameter (d), EDX analysis and materials

| No, analy. spot | d (μm) | C (%) | O (%) | Al (%) | Si (%) | Cu (%) | Na (%) | Cl (%) | Others (%)        | Materials |
|-----------------|--------|-------|-------|--------|--------|--------|--------|--------|-------------------|-----------|
| 1, 1            | 30.0   | 72.9  | 23.9  | 0      | 0      | 0      | 1.7    | 1.2    | 0.4 <sup>a</sup>  | A         |
| 2, 1            | 15.9   | 84.5  | 13.1  | 0      | 0      | 15.5   | 0      | 0      | 2.4 <sup>b</sup>  | A         |
| 3, 1            | 7.7    | 77.8  | 14.6  | 0      | 0      | 0      | 0      | 0      | 7.5 <sup>c</sup>  | A*        |
| 3, 2            | 7.7    | 77.5  | 15.0  | 0      | 0.3    | 0      | 0      | 0      | 7.3 <sup>d</sup>  | A*        |
| 4, 1            | 5.5    | 19.0  | 2.0   | 0      | 0      | 50.9   | 0      | 0      | 28.1 <sup>e</sup> | C         |
| 5, 1            | 4.6    | 33.0  | 0     | 0      | 0      | 43.0   | 0      | 0      | 24.0 <sup>f</sup> | C         |
| 6, 1            | 3.4    | 69.8  | 2.7   | 0      | 0      | 17.1   | 0      | 0      | 10.4 <sup>g</sup> | C         |
| 7, 1            | 27.3   | 82.5  | 13.6  | 0      | 0      | 0      | 1.6    | 1.3    | 1.1 <sup>h</sup>  | A         |
| 7, 2            | 27.3   | 78.2  | 20.1  | 0      | 0      | 0      | 0.7    | 0.7    | 0.4 <sup>i</sup>  | A         |
| 8, 1            | 29.4   | 75.4  | 21.5  | 0      | 0      | 0      | 1.4    | 0.9    | 0.8 <sup>j</sup>  | A         |
| 9, 1            | 15.0   | 89.3  | 10.7  | 0      | 0      | 0      | 0      | 0      | 0                 | A         |
| 9, 2            | 15.0   | 89.1  | 10.9  | 0      | 0      | 0      | 0      | 0      | 0                 | A         |
| 10, 1           | 5.0    | 73.8  | 22.5  | 0      | 2.0    | 0      | 0      | 0      | 1.8 <sup>k</sup>  | B         |
| 10, 2           | 5.0    | 70.2  | 25.9  | 0      | 2.0    | 0      | 0      | 0      | 1.9 <sup>l</sup>  | B         |
| 10, 3           | 5.0    | 70.6  | 26.0  | 0      | 2.0    | 0      | 0      | 0      | 1.5 <sup>m</sup>  | B         |

% = mol%. A: Non Si polymers. B: Si paints. C: Cu paints. D: Other paints. E: Al coating laminate films. F: Shell.

<sup>a</sup>) MoS<sub>2</sub> lubricant contamination <sup>a</sup>) K = 0.2% <sup>b</sup>) Sb = 2.4% <sup>c</sup>) S = 4.0%, Ti = 0.6%, Cr = 0.7, Mo = 2.1% <sup>d</sup>) S = 3.5%, Ti = 1.1%, Cr = 0.5, Mo = 2.1% <sup>e</sup>) Zn = 28.1% <sup>f</sup>) Zn = 24.0% <sup>g</sup>) Zn = 10.4% <sup>h</sup>) S = 0.3%, K = 0.8% <sup>i</sup>) S = 1.1%, K = 0.8%, Fe = 1.7% <sup>j</sup>) Zn = 5.6%, Pb = 0.2% <sup>k</sup>) Mg = 1.4%, Au = 0.3% <sup>l</sup>) Mg = 1.6%, Au = 0.3% <sup>m</sup>) Mg = 1.5%

TableS 7-2 Results of S7-B sample long diameter (d), EDX analysis and materials

| No, analy. spot | d (μm) | C (%) | O (%) | Al (%) | Si (%) | Cu (%) | Na (%) | Cl (%) | Others (%)        | Materials |
|-----------------|--------|-------|-------|--------|--------|--------|--------|--------|-------------------|-----------|
| 11, 1           | 33.3   | 78.6  | 18.8  | 0      | 0      | 0      | 1.1    | 1.0    | 0.6 <sup>a</sup>  | A         |
| 11, 2           | 33.3   | 86.2  | 7.9   | 0      | 0      | 0      | 1.6    | 2.0    | 2.4 <sup>b</sup>  | A         |
| 12, 1           | 9.4    | 0     | 0     | 0      | 0      | 61.4   | 0      | 0      | 38.6 <sup>c</sup> | C         |
| 12, 2           | 9.4    | 33.2  | 0     | 0      | 0      | 43.8   | 0      | 0      | 23.0 <sup>d</sup> | C         |
| 13, 1           | 3.8    | 76.1  | 21.3  | 0      | 0      | 0      | 1.3    | 1.1    | 0.2 <sup>e</sup>  | A         |
| 14, 1           | 27.6   | 76.9  | 21.0  | 0      | 0      | 0      | 1.0    | 1.1    | 0                 | A         |
| 14, 2           | 27.6   | 76.3  | 21.2  | 0      | 0      | 0      | 1.2    | 1.1    | 0.3 <sup>f</sup>  | A         |
| 15, 1           | 7.6    | 84.0  | 10.9  | 0      | 0      | 3.3*   | 0      | 0      | 1.8 <sup>g</sup>  | A         |
| 15, 2           | 7.6    | 80.8  | 19.2  | 0      | 0      | 0      | 0      | 0      | 0                 | A         |
| 15, 3           | 7.6    | 84.9  | 15.1  | 0      | 0      | 0      | 0      | 0      | 0                 | A         |
| 16, 1           | 14.4   | 54.8  | 31.1  | 0      | 13.0   | 0      | 0.3    | 0      | 0.8 <sup>h</sup>  | B         |
| 16, 2           | 14.4   | 49.8  | 38.4  | 0      | 11.4   | 0      | 0      | 0      | 0.5 <sup>i</sup>  | B         |
| 17, 1           | 7.3    | 29.8  | 0     | 0      | 0      | 43.9   | 0      | 0      | 26.3 <sup>j</sup> | C         |
| 18, 1           | 8.3    | 68.0  | 0     | 0      | 0      | 32.0   | 0      | 0      | 0                 | C         |
| 19, 1           | 3.0    | 69.9  | 3.0   | 0      | 0      | 17.4   | 0      | 0      | 9.8 <sup>k</sup>  | C         |
| 20, 1           | 55.6   | 39.2  | 1.8   | 5.2    | 0      | 33.5   | 0      | 0      | 20.4 <sup>l</sup> | C         |
| 21, 1           | 55.6   | 0     | 54.3  | 58.7   | 0      | 0      | 0      | 0      | 0                 | D*        |
| 22, 1           | 10.0   | 10.7  | 52.8  | 0      | 23.1   | 0      | 0      | 0      | 13.3 <sup>m</sup> | B         |
| 22, 2           | 10.0   | 30.2  | 47.6  | 0      | 12.9   | 0      | 0      | 0      | 9.3 <sup>n</sup>  | B         |

% = mol%. A: Non Si polymers. B: Si paints. C: Cu paints. D: Other paints. E: Al coating laminate films. F: Shell.

<sup>a</sup>) Al<sub>2</sub>O<sub>3</sub> contamination <sup>a</sup>) K = 0.6% <sup>b</sup>) K = 1.5%, Mo = 0.6%, Au = 0.4 <sup>c</sup>) Zn = 36.8%, Au = 1.8% <sup>d</sup>) Zn = 23.0%

<sup>e</sup>) Mg = 0.2% <sup>f</sup>) Mg = 0.3% <sup>g</sup>) Zn = 1.8% <sup>h</sup>) Cr = 0.8% <sup>i</sup>) Cr = 0.8% <sup>j</sup>) Zn = 25.3%, Pb = 1.0% <sup>k</sup>) Zn =

9.8% <sup>l</sup>) Zn = 20.1%, Au = 0.3% <sup>m</sup>) Mg = 13.3% <sup>n</sup>) Mg = 8.8%, Cr = 0.6%

TableS 7-3 Results of S7-B sample long diameter (d), EDX analysis and materials

| No, analy.<br>spot | d<br>( $\mu\text{m}$ ) | C<br>(%) | O<br>(%) | Al<br>(%) | Si<br>(%) | Cu<br>(%) | Na<br>(%) | Cl<br>(%) | Others<br>(%)     | Materials |
|--------------------|------------------------|----------|----------|-----------|-----------|-----------|-----------|-----------|-------------------|-----------|
| 23, 1              | 36.4                   | 8.6      | 0        | 0         | 0         | 59.1      | 0         | 0         | 32.3 <sup>a</sup> | C         |
| 23, 2              | 36.4                   | 26.4     | 0        | 0         | 0         | 46.9      | 0         | 0         | 26.7 <sup>b</sup> | C         |
| 24, 1              | 2.5                    | 67.6     | 23.3     | 9.1       | 0         | 0         | 0         | 0         | 0                 | E         |
| 25, 1              | 16.2                   | 44.2     | 3.6      | 0         | 0         | 32.7      | 0         | 0         | 19.6 <sup>c</sup> | C         |
| 26, 1              | 18.3                   | 92.7     | 6.0      | 0         | 0         | 1.0       | 0         | 0         | 0.3 <sup>d</sup>  | C         |
| 27, 1              | 27.3                   | 84.0     | 16.0     | 0         | 0         | 0         | 0         | 0         | 0                 | A         |
| 28, 1              | 3.0                    | 27.0     | 58.9     | 11.8      | 0         | 0         | 0.7       | 0         | 1.6 <sup>e</sup>  | E         |
| 29, 1              | 6.0                    | 38.5     | 50.3     | 9.4       | 0         | 0         | 0.4       | 0         | 1.4 <sup>f*</sup> | E         |
| 30, 1              | 24.1                   | 0        | 0        | 0         | 0         | 64.2      | 0         | 0         | 35.8 <sup>g</sup> | C         |
| 31, 1              | 4.2                    | 45.5     | 0        | 0         | 0         | 31.9      | 0         | 0         | 22.6 <sup>h</sup> | C         |
| 32, 1              | 6.7                    | 39.8     | 0        | 0         | 0         | 37.3      | 0         | 0         | 22.9 <sup>i</sup> | C         |
| 33, 1              | 20.0                   | 89.7     | 10.3     | 0         | 0         | 0         | 0         | 0         | 0                 | A         |
| 34, 1              | 1.5                    | 92.6     | 5.7      | 0         | 0         | 1.2       | 0         | 0         | 0.5 <sup>j</sup>  | C         |
| 35, 1              | 13.8                   | 94.7     | 3.7      | 0         | 0         | 1.6       | 0         | 0         | 0                 | C         |
| 36, 1              | 8.1                    | 13.9     | 60.6     | 0         | 14.3      | 0         | 0         | 0         | 11.2 <sup>k</sup> | B         |
| 36, 2              | 8.1                    | 30.3     | 42.0     | 0         | 10.8      | 0         | 0         | 0         | 10.8 <sup>l</sup> | B         |
| 37, 1              | 166.7                  | 93.4     | 6.6      | 0         | 0         | 0         | 0         | 0         | 0                 | A         |
| 37, 2              | 166.7                  | 92.8     | 7.2      | 0         | 0         | 0         | 0         | 0         | 0                 | A         |
| 37, 3              | 166.7                  | 95.8     | 4.2      | 0         | 0         | 0         | 0         | 0         | 0                 | A         |

% = mol%. A: Non Si polymers. B: Si paints. C: Cu paints. D: Other paints. E: Al coating laminate films. F: Shell.

<sup>a</sup>) MoS<sub>2</sub> lubricant contamination    <sup>a</sup>) Zn = 32.3%    <sup>b</sup>) Zn = 26.7%    <sup>c</sup>) Zn = 19.1%, Pb = 0.5%    <sup>d</sup>) Au = 0.3%    <sup>e</sup>) S = 1.6%    <sup>f</sup>) S = 1.1%, Mo = 0.4%    <sup>g</sup>) Zn = 35.8%    <sup>h</sup>) Zn = 22.6%    <sup>i</sup>) Zn = 22.9%    <sup>j</sup>) Zn = 0.5%    <sup>k</sup>) Mg = 11.2%

<sup>l</sup>) Mg = 11.2%

TableS 7-4 Results of S7-B sample long diameter (d), EDX analysis and materials

| No, analy.<br>spot | d<br>( $\mu\text{m}$ ) | C<br>(%) | O<br>(%) | Al<br>(%) | Si<br>(%) | Cu<br>(%) | Na<br>(%) | Cl<br>(%) | Others<br>(%)     | Materials |
|--------------------|------------------------|----------|----------|-----------|-----------|-----------|-----------|-----------|-------------------|-----------|
| 38, 1              | 5.6                    | 72.3     | 3.0      | 0         | 0         | 15.7      | 0         | 0         | 9.1 <sup>a</sup>  | C         |
| 39, 1              | 5.2                    | 51.1     | 3.9      | 0         | 0         | 27.8      | 0         | 0         | 17.2 <sup>b</sup> | C         |
| 40, 1              | 9.3                    | 77.9     | 20.8     | 0         | 0         | 0         | 0         | 0         | 1.3 <sup>c</sup>  | A         |

% = mol%. A: Non Si polymers. B: Si paints. C: Cu paints. D: Other paints. E: Al coating laminate films. F: Shell.

<sup>a)</sup> Zn = 9.1%    <sup>b)</sup> Znr = 17.2%    <sup>c)</sup> Znr = 1.3%

TableS 8-1 Results of S7-D sample long diameter (d), EDX analysis and materials

| No, analy. spot | d (μm) | C (%) | O (%) | Al (%) | Si (%) | Cu (%) | Na (%) | Cl (%) | Others (%)        | Materials |
|-----------------|--------|-------|-------|--------|--------|--------|--------|--------|-------------------|-----------|
| 1, 1            | 26.3   | 33.8  | 39.3  | 26.    | 0      | 0      | 0      | 0      | 0                 | E         |
| 2, 1            | 8.0    | 68.4  | 26.7  | 0      | 2.7    | 0      | 0      | 0      | 2.2 <sup>a</sup>  | B         |
| 3, 1            | 3.4    | 44.3  | 41.9  | 0      | 7.7    | 0      | 0      | 0      | 6.1 <sup>b</sup>  | B         |
| 4, 1            | 7.3    | 66.3  | 24.0  | 0      | 5.7    | 0      | 0      | 0      | 4.0 <sup>c</sup>  | B         |
| 4, 2            | 7.3    | 29.6  | 51.7  | 0      | 10.3   | 0      | 0      | 0      | 8.4 <sup>d</sup>  | B         |
| 5, 1            | 6.0    | 48.3  | 43.8  | 6.5    | 0      | 0      | 0.3    | 0.3    | 0.8 <sup>e</sup>  | E         |
| 6, 1            | 3.8    | 53.1  | 40.5  | 5.7    | 0      | 0      | 0      | 0.2    | 0.7 <sup>f</sup>  | E         |
| 7, 1            | 4.5    | 47.5  | 43.7  | 7.4    | 0      | 0      | 0.5    | 0.4    | 0.6 <sup>g</sup>  | E         |
| 8, 1            | 6.5    | 50.0  | 42.2  | 6.6    | 0      | 0      | 0.4    | 0.3    | 0.5 <sup>h</sup>  | E         |
| 9, 1            | 4.0    | 38.0  | 51.6  | 8.6    | 0      | 0      | 0.5    | 0.3    | 1.0 <sup>i</sup>  | E         |
| 10, 1           | 7.5    | 65.6  | 3.2   | 0      | 0      | 19.2   | 0      | 0      | 12.1 <sup>j</sup> | C         |
| 11, 1           | 3.7    | 55.8  | 2.8   | 0      | 0      | 26.3   | 0      | 0      | 15.0 <sup>k</sup> | C         |
| 12, 1           | 1.7    | 72.8  | 3.2   | 0      | 0      | 14.9   | 0      | 0      | 9.1 <sup>l</sup>  | C         |
| 13, 1           | 7.0    | 38.7  | 2.1   | 0      | 0      | 38.0   | 0      | 0      | 21.3 <sup>m</sup> | C         |
| 14, 1           | 2.0    | 81.1  | 7.9   | 0      | 0      | 6.6    | 0      | 0      | 4.4 <sup>n</sup>  | C         |
| 15, 1           | 10.0   | 75.7  | 9.1   | 0      | 1.7    | 6.9    | 0      | 0      | 6.6 <sup>o</sup>  | C         |
| 16, 1           | 10.0   | 74.8  | 25.2  | 0      | 0      | 0      | 0      | 0      | 0                 | A         |
| 17, 1           | 13.5   | 29.8  | 43.7  | 0      | 15.9   | 0      | 0      | 0      | 10.6 <sup>p</sup> | B         |
| 17, 2           | 13.5   | 51.1  | 25.7  | 0      | 14.7   | 0      | 0      | 0      | 8.5 <sup>q</sup>  | B         |

% = mol%. A: Non Si polymers. B: Si paints. C: Cu paints. D: Other paints. E: Al coating laminate films. F: Shell.

<sup>a)</sup> Mg = 2.2%   <sup>b)</sup> Mg = 7.1%   <sup>c)</sup> Mg = 4.0%   <sup>d)</sup> Mg = 8.4%   <sup>e)</sup> S = 0.8%   <sup>f)</sup> S = 0.7%   <sup>g)</sup> S = 0.6%   <sup>h)</sup> S = 0.5%

<sup>i)</sup> S = 1.0%   <sup>j)</sup> Zn = 12.1%   <sup>k)</sup> Zn = 15.0%   <sup>l)</sup> Zn = 8.4%, Pb = 0.7%   <sup>m)</sup> Zn = 21.3%   <sup>n)</sup> S = 0.3%, K = 0.5%, Zn

= 3.6%   <sup>o)</sup> K = 1.7%, Zn = 4.8%   <sup>p)</sup> Mg = 10.6%   <sup>q)</sup> Mg = 8.5%

TableS 8-2 Results of S7-D sample long diameter (d), EDX analysis and materials

| No, analy.<br>spot | d<br>( $\mu\text{m}$ ) | C<br>(%) | O<br>(%) | Al<br>(%) | Si<br>(%) | Cu<br>(%) | Na<br>(%) | Cl<br>(%) | Others<br>(%)     | Materials |
|--------------------|------------------------|----------|----------|-----------|-----------|-----------|-----------|-----------|-------------------|-----------|
| 18, 1              | 22.0                   | 30.8     | 42.6     | 0         | 16.0      | 0         | 0         | 0         | 10.7 <sup>a</sup> | B         |
| 19, 1              | 4.0                    | 51.0     | 39.5     | 0         | 5.3       | 0         | 0         | 0         | 4.2 <sup>b</sup>  | B         |
| 20, 1              | 6.0                    | 41.8     | 42.8     | 0         | 8.7       | 0         | 0         | 0         | 6.7 <sup>c</sup>  | B         |
| 21, 1              | 9.1                    | 52.0     | 35.5     | 0         | 6.8       | 0         | 0         | 0         | 5.7 <sup>d</sup>  | B         |
| 21, 2              | 9.1                    | 37.8     | 43.4     | 0         | 10.8      | 0         | 0         | 0         | 8.0 <sup>e</sup>  | B         |
| 22, 1              | 2.3                    | 50.0     | 3.9      | 0         | 0         | 29.2      | 0         | 0         | 17.0 <sup>f</sup> | C         |
| 23, 1              | 3.0                    | 42.7     | 2.6      | 0         | 0         | 34.5      | 0         | 0         | 20.1 <sup>g</sup> | C         |
| 24, 1              | 6.3                    | 21.7     | 0        | 0         | 0         | 51.4      | 0         | 0         | 26.9 <sup>h</sup> | C         |
| 24, 2              | 6.3                    | 21.2     | 0        | 0         | 0         | 50.6      | 0         | 0         | 28.2 <sup>i</sup> | C         |

% = mol%. A: Non Si polymers. B: Si paints. C: Cu paints. D: Other paints. E: Al coating laminate films. F: Shell.

<sup>a</sup>) MoS<sub>2</sub> lubricant contamination    <sup>a</sup>) Zn = 23.3%    <sup>b</sup>) Mg = 4.2%    <sup>c</sup>) Mg = 6.7%    <sup>d</sup>) Mg = 5.3%, Cr = 0.4    <sup>e</sup>) Mg = 8.0%    <sup>f</sup>) Zn = 16.1%, Pb = 0.8%    <sup>g</sup>) Zn = 19.5%, Au = 0.7%    <sup>h</sup>) Zn = 26.9%    <sup>i</sup>) Zn = 28.2%

TableS 8-3 Results of S7-D sample long diameter (d), EDX analysis and materials

| No, analy. spot | d (μm) | C (%) | O (%) | Al (%) | Si (%) | Cu (%) | Na (%) | Cl (%) | Others (%)        | Materials |
|-----------------|--------|-------|-------|--------|--------|--------|--------|--------|-------------------|-----------|
| 25, 1           | 12.8   | 83.3  | 13.4  | 0      | 0      | 0      | 1.3    | 1.5    | 0.5 <sup>a</sup>  | A         |
| 25, 2           | 12.8   | 81.4  | 17.2  | 0      | 0      | 0      | 0.8    | 0.6    | 0                 | A         |
| 26, 1           | 17.5   | 39.3  | 34.2  | 12.5   | 13.1   | 0      | 0      | 0      | 1.1 <sup>b</sup>  | B         |
| 26, 2           | 17.5   | 38.1  | 35.8  | 11.8   | 12.8   | 0      | 0      | 0      | 1.4 <sup>c</sup>  | B         |
| 27, 1           | 20.0   | 94.1  | 4.0   | 0      | 1.5    | 0      | 0      | 0      | 0.3 <sup>d</sup>  | C         |
| 28, 1           | 16.0   | 94.0  | 5.8   | 0      | 0      | 0      | 0      | 0      | 0.3 <sup>e</sup>  | A         |
| 29, 1           | 15.0   | 80.3  | 3.0   | 0      | 10.8   | 0      | 0      | 0      | 6.0 <sup>f</sup>  | C         |
| 30, 1           | 23.3   | 46.9  | 2.8   | 0      | 31.8   | 0      | 0      | 0      | 18.6 <sup>g</sup> | C         |
| 31, 1           | 5.7    | 72.0  | 5.4   | 0      | 0      | 14.5   | 0      | 0      | 8.1 <sup>h</sup>  | C         |
| 32, 1           | 3.6    | 63.3  | 2.8   | 0      | 0      | 21.2   | 0      | 0      | 12.7 <sup>i</sup> | C         |
| 33, 1           | 7.0    | 47.5  | 2.1   | 0      | 0      | 32.0   | 0      | 0      | 18.4 <sup>j</sup> | C         |
| 34, 1           | 10.0   | 63.6  | 3.0   | 0      | 0      | 20.8   | 0      | 0      | 12.6 <sup>k</sup> | C         |
| 35, 1           | 6.4    | 30.9  | 5.3   | 0      | 0      | 39.0   | 0      | 0      | 24.7 <sup>l</sup> | C         |
| 36, 1           | 17.9   | 92.3  | 7.7   | 0      | 0      | 0      | 0      | 0      | 0                 | A         |
| 37, 1           | 8.8    | 91.5  | 6.9   | 0      | 0      | 1.6    | 0      | 0      | 0                 | C         |
| 38, 1           | 5.0    | 58.6  | 17.0  | 2.8    | 4.7    | 6.4    | 0      | 0      | 10.6 <sup>m</sup> | B         |
| 39, 1           | 18.3   | 94.1  | 5.9   | 0      | 0      | 0      | 0      | 0      | 0                 | A         |
| 40, 1           | 12.6   | 70.0  | 5.8   | 0      | 0      | 0      | 0      | 0.4    | 23.8 <sup>n</sup> | D         |
| 40, 2           | 12.6   | 43.6  | 2.2   |        | 0      | 0      | 0      | 0      | 54.2 <sup>o</sup> | D         |

% = mol%. A: Non Si polymers. B: Si paints. C: Cu paints. D: Other paints. E: Al coating laminate films. F: Shell.

<sup>a)</sup> Mg = 2.2%   <sup>b)</sup> Mg = 0.4%, K = 0.6%   <sup>c)</sup> K = 0.6%, Fe = 0.8%   <sup>d)</sup> Au = 0.3%   <sup>e)</sup> Au = 0.3%   <sup>f)</sup> Zn = 6.0%   <sup>g)</sup> Zn = 18.6%   <sup>h)</sup> Zn = 8.1%   <sup>i)</sup> Zn = 12.7%   <sup>j)</sup> Zn = 18.4%   <sup>k)</sup> Zn = 12.6%   <sup>l)</sup> Zn = 21.9%, Pb = 2.9%   <sup>m)</sup> Mg = 7.2%, Zn = 3.4%   <sup>n)</sup> Ni = 23.8%   <sup>o)</sup> Ni = 54.2%



TableS 8-4 Results of S7-D sample long diameter (d), EDX analysis and materials

| No, analy.<br>spot | d<br>(μm) | C<br>(%) | O<br>(%) | Al<br>(%) | Si<br>(%) | Cu<br>(%) | Na<br>(%) | Cl<br>(%) | Others<br>(%)    | Materials |
|--------------------|-----------|----------|----------|-----------|-----------|-----------|-----------|-----------|------------------|-----------|
| 41, 1              | 19.0      | 15.7     | 50.3     | 31.9      | 0         | 0         | 2.1       | 0         | 0                | E         |
| 42, 1              | 18.3      | 62.3     | 29.6     | 1.0       | 2.7       | 0         | 1.4       | 1.1       | 2.1 <sup>a</sup> | B         |
| 43, 1              | 10.0      | 85.4     | 14.0     | 0.3.      | 0.4       | 0         | 0         | 0         | 0                | A         |

% = mol%. A: Non Si polymers. B: Si paints. C: Cu paints. D: Other paints. E: Al coating laminate films. F: Shell.

<sup>a)</sup> K = 0.8%, Fe = 1.3%

TableS 9-1 Results of S9-B sample long diameter (d), EDX analysis and materials

| No, analy. spot | d (μm) | C (%) | O (%) | Al (%) | Si (%) | Cu (%) | Na (%) | Cl (%) | Others (%)        | Materials |
|-----------------|--------|-------|-------|--------|--------|--------|--------|--------|-------------------|-----------|
| 1, 1            | 8.7    | 36.7  | 0     | 0      | 0      | 63.3   | 0      | 0      | 0                 | C         |
| 2, 1            | 3.0    | 45.3  | 0     | 0      | 0      | 50.1   | 0      | 0      | 4.6 <sup>a</sup>  | C         |
| 3, 1            | 6.0    | 62.3  | 18.8  | 0      | 0      | 0      | 1.2    | 0      | 17.8 <sup>b</sup> | D         |
| 4, 1            | 5.3    | 100   | 0     | 0      | 0      | 0      | 0      | 0      | 0                 | A         |
| 5, 1            | 0.7    | 65.2  | 4.5   | 0      | 0      | 18.1   | 0      | 0      | 12.3 <sup>c</sup> | C         |
| 5, 2            | 0.7    | 51.3  | 0     | 0      | 0      | 30.8   | 0      | 0      | 17.9 <sup>d</sup> | C         |
| 6, 1            | 2.3    | 41.7  | 9.7   | 0      | 0      | 28.3   | 0      | 0      | 20.3 <sup>e</sup> | C         |
| 6, 2            | 2.3    | 35.0  | 0     | 0      | 0      | 41.1   | 0      | 0      | 23.9 <sup>f</sup> | C         |
| 7, 1            | 5.4    | 77.1  | 0     | 0      | 0      | 15.9   | 0      | 0      | 7.0 <sup>g</sup>  | C         |
| 8, 2            | 6.2    | 46.8  | 2.4   | 0      | 0      | 32.0   | 0      | 0      | 18.8 <sup>h</sup> | C         |
| 9, 3            | 7.6    | 62.9  | 0     | 0      | 0      | 23.0   | 0      | 0      | 14.1 <sup>i</sup> | C         |
| 10, 1           | 5.2    | 0     | 0     | 0      | 0      | 64.1   | 0      | 0      | 36.0 <sup>j</sup> | C         |
| 11, 1           | 19.5   | 0     | 7.1   | 0      | 0      | 51.6   | 0      | 0      | 41.4 <sup>k</sup> | C         |
| 12, 1           | 38.0   | 78.8  | 14.3  | 2.1    | 0      | 0      | 0      | 4.8    | 0                 | E         |
| 13, 1           | 3.5    | 87.3  | 11.0  | 0      | 0.6    | 0      | 0      | 1.2    | 0                 | A         |
| 14, 1           | 7.4    | 67.4  | 6.2   | 0      | 16.3   | 0      | 0      | 0      | 11.1 <sup>l</sup> | B         |
| 15, 1           | 34.3   | 44.7  | 0     | 0      | 12.2   | 0      | 0      | 0      | 8.9 <sup>m</sup>  | B         |
| 16, 1           | 5.8    | 13.0  | 1.3   | 0      | 0      | 54.5   | 0      | 0      | 31.2 <sup>n</sup> | C         |
| 17, 1           | 8.5    | 23.2  | 3.1   | 0      | 0      | 47.2   | 0      | 0      | 26.6 <sup>o</sup> | C         |
| 18, 1           | 9.0    | 29.0  | 4.0   | 0      | 0      | 39.1   | 0      | 0      | 27.9 <sup>p</sup> | C         |

% = mol%. A: Non Si polymers. B: Si paints. C: Cu paints. D: Other paints. E: Al coating laminate films. F: Shell.

<sup>a</sup>) Mg = 4.6%   <sup>b</sup>) S = 8.8%, Pb = 9.0%   <sup>c</sup>) Zn = 12.3%   <sup>d</sup>) Zn = 17.9%   <sup>e</sup>) Zn = 19.6%, Pb = 0.6%   <sup>f</sup>) Zn = 23.9%

<sup>g</sup>) Zn = 7.0%   <sup>h</sup>) Zn = 18.8%   <sup>i</sup>) Zn = 14.1%   <sup>j</sup>) Zn = 36.0%   <sup>k</sup>) S=6.3, Zn = 27.5%, Pb = 7.6%   <sup>l</sup>) Zn = 9.2%, Pb

= 0.9%   <sup>m</sup>) Mg = 8.9%   <sup>n</sup>) Zn = 31.2%   <sup>o</sup>) Zn = 26.6%   <sup>p</sup>) Zn = 27.2%, Pb = 0.8%

TableS 9-2 Results of S9-B sample long diameter (d), EDX analysis and materials

| No, analy. spot | d (μm) | C (%) | O (%) | Al (%) | Si (%) | Cu (%) | Na (%) | Cl (%) | Others (%)        | Materials |
|-----------------|--------|-------|-------|--------|--------|--------|--------|--------|-------------------|-----------|
| 19, 1           | 12.9   | 34.4  | 4.8   | 0      | 0      | 37.6   | 0      | 0      | 23.3 <sup>a</sup> | C         |
| 20, 1           | 8.3    | 41.2  | 1.0   | 0      | 0      | 32.9   | 0      | 0      | 24.8 <sup>b</sup> | C         |
| 21, 1           | 19.0   | 36.9  | 38.3  | 24.8   | 0      | 0      | 0      | 0      | 0                 | E         |
| 22, 1           | 17.5   | 10.5  | 36.1  | 0      | 0      | 0      | 0      | 0      | 53.4 <sup>c</sup> | D*        |
| 23, 1           | 21.5   | 81.0  | 19.0  | 0      | 0      | 0      | 0      | 0      | 0                 | A         |
| 24, 1           | 9.1    | 0     | 0     | 0      | 0      | 62.2   | 0      | 0      | 37.8 <sup>d</sup> | C         |
| 25, 1           | 3.1    | 16.4  | 0     | 0      | 0      | 53.0   | 0      | 0      | 30.6 <sup>e</sup> | C         |
| 26, 1           | 4.3    | 25.5  | 0     | 0      | 0      | 45.9   | 0      | 0      | 28.6 <sup>f</sup> | C         |
| 27, 1           | 2.0    | 68.6  | 27.0  | 0      | 2.6    | 0      | 0.5    | 0      | 1.4 <sup>g</sup>  | B         |
| 28, 1           | 8.0    | 83.7  | 14.9  | 0      | 0      | 0      | 0.8    | 0.6    | 0                 | A         |
| 29, 1           | 11.0   | 47.9  | 5.5   | 0      | 0      | 29.1   | 0      | 0      | 17.5 <sup>h</sup> | C         |
| 29, 2           | 11.0   | 88.5  | 4.5   | 0      | 0      | 4.4    | 0      | 0      | 2.7 <sup>i</sup>  | C         |

% = mol%. A: Non Si polymers. B: Si paints. C: Cu paints. D: Other paints. E: Al coating laminate films. F: Shell.  
<sup>a</sup>) MoS<sub>2</sub> lubricant contamination    <sup>a</sup>) Zn = 23.3%    <sup>b</sup>) S = 8.8%, Pb = 9.0%    <sup>c</sup>) S = 12.4%, K = 8.8%, Fe = 26.2%, Mo = 5.8%    <sup>d</sup>) Zn = 37.8%    <sup>e</sup>) Zn = 30.6%    <sup>f</sup>) Zn = 28.6%    <sup>g</sup>) Zn = 7.0%    <sup>h</sup>) Zn = 17.0%, Pb = 0.5%    <sup>i</sup>) Zn = 2.7% = 0.8%

TableS 9-3 Results of S9-B sample long diameter (d), EDX analysis and materials

| No, analy.<br>spot | d<br>(μm) | C<br>(%) | O<br>(%) | Al<br>(%) | Si<br>(%) | Cu<br>(%) | Na<br>(%) | Cl<br>(%) | Others<br>(%)     | Materials |
|--------------------|-----------|----------|----------|-----------|-----------|-----------|-----------|-----------|-------------------|-----------|
| 30, 1              | 4.3       | 57.6     | 34.8     | 0.3       | 6.8       | 0         | 0.6       | 0         | 0                 | B         |
| 31, 1              | 0.4       | 57.8     | 35.4     | 0.3       | 6.0       | 32.9      | 0.5       | 0         | 0                 | C         |
| 32, 1              | 6.6       | 19.3     | 55.2     | 0         | 0         | 0         | 3.5       | 0         | 21.9 <sup>a</sup> | F*        |
| 33, 1              | 0.9       | 14.6     | 59.9     | 0         | 0         | 0         | 2.9       | 0         | 22.7 <sup>b</sup> | F*        |
| 34, 1              | 1.8       | 44.2     | 6.4      | 0         | 0         | 29.7      | 0         | 0         | 19.7 <sup>c</sup> | C         |
| 35, 1              | 1.3       | 15.3     | 2.0      | 0         | 0         | 47.8      | 0         | 0         | 34.8 <sup>d</sup> | C         |
| 36, 1              | 38.4      | 78.2     | 19.6     | 0         | 0.4       | 0         | 0.5       | 0.4       | 1.0 <sup>e</sup>  | A         |
| 37, 1              | 48.5      | 59.4     | 3.1      | 0         | 0         | 0         | 17.4      | 20.       | 0                 | A         |
| 38, 1              | 30.8      | 69.9     | 11.5     | 0         | 0         | 10.1      | 5.4       | 1         | 0                 | C         |
| 39, 1              | 4.5       | 49.0     | 38.3     | 0.5       | 11.5      | 0         | 0.7       | 3.1       | 0                 | B         |

% = mol%. A: Non Si polymers. B: Si paints. C: Cu paints. D: Other paints. E: Al coating laminate films. F: Shell.

<sup>a</sup>) MoS<sub>2</sub> lubricant contamination    <sup>a</sup>) S = 8.0%, K = 1.2, Ca = 9.1, Mo = 3.6%    <sup>b</sup>) S = 7.6%, K = 1.2, Ca = 9.8, Mo = 4.1%    <sup>c</sup>) Zn = 19.7%    <sup>d</sup>) Zn = 34.2%, Pb = 0.8%    <sup>e</sup>) S = 0.7%, Ca = 0.3%

TableS 10-1 Results of S9-D sample long diameter (d), EDX analysis and materials

| No, analy. spot | d (μm) | C (%) | O (%) | Al (%) | Si (%) | Cu (%) | Na (%) | Cl (%) | Others (%)        | Materials |
|-----------------|--------|-------|-------|--------|--------|--------|--------|--------|-------------------|-----------|
| 1, 1            | 8.8    | 11.9  | 0     | 0      | 0      | 54.2   | 0      | 0      | 33.8 <sup>a</sup> | C         |
| 2, 1            | 3.1    | 11.1  | 64.5  | 0      | 0      | 50.1   | 0      | 0      | 24.3 <sup>b</sup> | C*        |
| 3, 1            | 4.2    | 15.6  | 67.9  | 0      | 0      | 0      | 0      | 0      | 16.5 <sup>c</sup> | D         |
| 4, 1            | 5.1    | 12.5  | 71.7  | 0      | 0      | 0      | 0      | 0      | 15.8 <sup>d</sup> | D*        |
| 5, 1            | 4.5    | 29.1  | 4.1   | 0      | 0      | 41.4   | 0      | 0      | 25.4 <sup>e</sup> | C         |
| 6, 1            | 5.3    | 0     | 2.7   | 0      | 0      | 63.2   | 0      | 0      | 34.1 <sup>f</sup> | C         |
| 7, 1            | 5.0    | 50.1  | 3.7   | 0      | 0      | 27.8   | 0      | 0      | 18.5 <sup>g</sup> | C         |
| 8, 1            | 4.5    | 59.4  | 4.2   | 0      | 0      | 23.3   | 0      | 0      | 13.1 <sup>h</sup> | C         |
| 9, 1            | 3.4    | 30.1  | 3.0   | 0      | 0      | 42.2   | 0      | 0      | 24.7 <sup>i</sup> | C         |
| 10, 1           | 3.1    | 47.9  | 3.3   | 0      | 0      | 30.7   | 0      | 0      | 18.2 <sup>j</sup> | C         |
| 11, 1           | 1.0    | 78.1  | 18.1  | 0      | 0      | 0      | 1.5    | 1.2    | 1.0 <sup>k</sup>  | A         |
| 12, 1           | 24.0   | 78.5  | 18.3  | 0      | 0      | 0      | 0.9    | 0.7    | 1.7 <sup>l</sup>  | A         |
| 13, 1           | 4.0    | 60.2  | 30.5  | 0      | 0      | 2.7    | 0      | 0.5    | 6.2 <sup>m</sup>  | C         |
| 14, 1           | 10.0   | 12.1  | 57.2  | 0      | 17.6   | 0      | 0      | 0      | 13.1 <sup>n</sup> | B         |
| 14, 2           | 10.0   | 23.3  | 54.3  | 0      | 12.5   | 0      | 0      | 0      | 10.0 <sup>o</sup> | B         |
| 15, 1           | 21.2   | 77.2  | 17.2  | 0.5    | 1.7    | 0      | 1.1    | 0.9    | 1.4 <sup>p</sup>  | A         |
| 15, 2           | 21.2   | 80.1  | 15.8  | 0      | 0.8    | 0      | 0.4    | 1.1    | 1.8 <sup>q</sup>  | A         |

% = mol%. A: Non Si polymers. B: Si paints. C: Cu paints. D: Other paints. E: Al coating laminate films. F: Shell.

<sup>a</sup>) MoS<sub>2</sub> lubricant contamination    <sup>a</sup>) Zn = 33.8%    <sup>b</sup>) S = 6.3%, K = 3.7%, Fe = 11.2%, Mo = 3.2%    <sup>c</sup>) S = 5.7%, K = 2.7%, Fe = 7.5%, Ti = 0.5%    <sup>d</sup>) S = 4.6%, K = 2.5%, Fe = 7.0%, Mo = 1.7%    <sup>e</sup>) Zn = 23.3%, Au = 1.0, Pb = 1.1%    <sup>f</sup>) Zn = 34.1%    <sup>g</sup>) S = 0.4%, Zn = 17.5%, Pb = 0.5%    <sup>h</sup>) Zn = 12.8%, Pb = 0.3%    <sup>i</sup>) Zn = 24.7%    <sup>j</sup>) Zn = 18.2%    <sup>k</sup>) S = 0.5, K = 0.5%    <sup>l</sup>) S = 0.5%, K = 0.6%, Fe = 0.6    <sup>m</sup>) S = 1.6%, K = 0.8, Fe = 2.1, Zn = 1.7    <sup>n</sup>) Mg = 13.1%    <sup>o</sup>) Mg = 10.0%    <sup>p</sup>) S = 0.4%, K = 0.5%, Mg = 0.2%, P = 0.3%    <sup>q</sup>) S = 0.6%, Zn = 1.2%, Ti = 0.1%

TableS 10-2 Results of S9-D sample long diameter (d), EDX analysis and materials

| No, analy. spot | d (μm) | C (%) | O (%) | Al (%) | Si (%) | Cu (%) | Na (%) | Cl (%) | Others (%)        | Materials |
|-----------------|--------|-------|-------|--------|--------|--------|--------|--------|-------------------|-----------|
| 16, 1           | 2.5    | 70.4  | 4.5   | 0      | 0      | 15.8   | 0      | 0      | 9.3 <sup>a</sup>  | C         |
| 17, 1           | 7.0    | 63.2  | 3.6   | 0      | 0      | 20.9   | 0      | 0      | 12.3 <sup>b</sup> | C         |
| 18, 1           | 5.0    | 29.1  | 2.1   | 0      | 0      | 44.2   | 0      | 0      | 24.6 <sup>c</sup> | C         |
| 19, 1           | 10.0   | 9.4   | 0     | 0      | 0      | 53.4   | 0      | 0      | 37.1 <sup>d</sup> | C         |
| 19, 2           | 10.0   | 14.8  | 0     | 0      | 0      | 49.1   | 0      | 0      | 36.1 <sup>e</sup> | C         |
| 19, 3           | 10.0   | 13.0  | 0     | 0      | 0      | 55.0   | 0      | 0      | 32.0 <sup>f</sup> | C         |
| 20, 1           | 100.0  | 18.3  | 55.4  | 0      | 0      | 0      | 0      | 0      | 26.3 <sup>g</sup> | F         |
| 20, 2           | 100.0  | 19.4  | 57.8  | 0      | 0      | 0      | 0      | 0      | 22.8 <sup>h</sup> | F         |
| 21, 1           | 68.6   | 19.5  | 61.7  | 0      | 0      | 0      | 0      | 0      | 18.8 <sup>i</sup> | F         |
| 22.1            | 7.7    | 38.7  | 0     | 0      | 0      | 39.1   | 0      | 0      | 18.2 <sup>j</sup> | C         |
| 22.2            | 7.7    | 63.8  | 6.9   | 0      | 0      | 18.1   | 0      | 0      | 11.1 <sup>k</sup> | C         |
| 22.3            | 7.7    | 21.1  | 3.0   | 0      | 0      | 48.4   | 0      | 0      | 27.4 <sup>l</sup> | C         |
| 22.4            | 7.7    | 70.8  | 16.5  | 0      | 0      | 5.0    | 0      | 0.4    | 7.4 <sup>m</sup>  | C         |
| 23, 1           | 7.0    | 63.1  | 1.6   | 0      | 22.8   | 0      | 0      | 0      | 12.6 <sup>n</sup> | B         |
| 24, 1           | 5.7    | 13.3  | 0     | 0      | 56.2   | 0      | 0      | 0      | 30.5 <sup>o</sup> | B         |
| 25, 1           | 4.1    | 24.5  | 4.0   | 0      | 46.1   | 0      | 0      | 0      | 25.4 <sup>p</sup> | B         |

% = mol%. A: Non Si polymers. B: Si paints. C: Cu paints. D: Other paints. E: Al coating laminate films. F: Shell.

<sup>a)</sup> Zn = 9.3%   <sup>b)</sup> Zn = 12.3%   <sup>c)</sup> Zn = 24.6%   <sup>d)</sup> Zn = 37.1%   <sup>e)</sup> Zn = 36.1%   <sup>f)</sup> Zn = 32.0%   <sup>g)</sup> Ca = 26.3%

<sup>h)</sup> Ca = 22.8%   <sup>i)</sup> Ca = 18.8%   <sup>j)</sup> Zn = 22.1%   <sup>k)</sup> Zn = 11.1%   <sup>l)</sup> Zn = 27.4%   <sup>m)</sup> S = 1.9%, K = 2.7%, Zn = 2.8%

<sup>n)</sup> Zn = 12.6%   <sup>o)</sup> Zn = 30.5%   <sup>p)</sup> Zn = 25.4%
